# Supplementary material for: Reduced surface fine dust under droughts over the southeastern United States during summertime: observations and CMIP6 model simulations
Source: Copernicus journal article supplement (doi:10.5194/egusphere-2022-18), 2022-02-28
Supplement: Supplementary file [file egusphere-2022-18-AC1-supplement.pdf]

## Reply to Reviewers

We sincerely appreciate all the reviewers for their constructive comments to improve the manuscript. Their comments are reproduced below followed by our responses in blue. The corresponding edits in the manuscript are highlighted with track changes.

### Reviewer #1:

#### General Comments:

The manuscript “Reduced surface fine dust under droughts over the southeastern United States during summertime: observations and CMIP6 model simulations” by Li and Wang explores the drought-dust sensitivities over the CONUS based on observations and four AerChemMIP models. The authors found negative drought-dust sensitivities over the southeastern US as opposed to the usual positive sensitivities found over the western US. They associate these anomalous sensitivities over the southeastern US to decreased emissions and trans-Atlantic transport of African dust. The manuscript is well written, and the content is straight-forward with reasonable conclusions. I appreciate that the authors consider multiple observational products and analysis to add confidence to their findings. I recommend acceptance with minor revisions.

#### Specific Comments:

(1). In line 102-103, if I understand correctly, the EPA-CSN data is remapped from 1x1 (coarse) to 0.5x0.5 (fine) grids using bilinear interpolation? It is often recommended to use conservative remapping when regridding from coarse to fine resolution. This way we can avoid biases near high emission/near-source regions.

**Response:** Thanks for the suggestion. Because of the bias between IMPROVE and EPA-CSN sites as suggested by the other reviewer (comment on Line 97), we changed to use the IMPROVE sites only and recreated the dataset with a finer resolution (0.5x0.5). Therefore, the remapping process from coarse to fine grids was deleted in the revised manuscript.

(2). In figure 2a, does the southeast US region show significant regression slopes when the dust is constrained within SPEI<0.5 bins? I understand that it will contain a substantial amount of missing data, but I would be curious to see the spatial distribution of the slopes under dry conditions. Also, I do not see the point of p-value in Figure 2b (southeast case). I realize that there is a positive relationship between SPEI and dust concentration, but it is not significant based on regional averages. So, consider looking at the slopes at each grid box to show the spatial distribution of the SPEI-dust sensitivity with significance.

**Response:** As suggested, we calculated the regression slopes at each grid box under dry conditions only in Figure R1c (also new Figure 2c) and indeed more grid boxes in the SEUS emerge with positive slopes than in Figure 2a. On the regional scale, the insignificant regression slope was due to few SPEI bins. To avoid this issue, we applied a different way to do the analysis, which is to calculate the average dust concentration grid by grid for each SPEI bin and then average grid-mean dust per SPEI bin to get the regional-mean dust concentration. This grid-by-grid analysis expands the SPEI range to between -2.5 and 2.5 and increases the number of SPEI bins to 10 (Figure R1b). The number of grids at each bin is greater than 160 (~50% out of 321 grids) over the SEUS to ensure the bin separation can represent the regional conditions.

Dust in the SEUS still exhibits a non-linear trend with SPEI (Figure R1b). The new linear fit under dry conditions (SPEI < 0.5) over the SEUS shows a significant (P-val < 0.01) slope of 0.23  $\mu\text{g}/\text{m}^3$  per unit of SPEI. This revised analysis suggests that the averaging by grids within different SPEI bins is essential to reduce noises and capture the signal of the drought-dust sensitivity in the SEUS. The discussion was added in Line184-199 of the revised manuscript with Figure R1 inserted as new Figure 2.

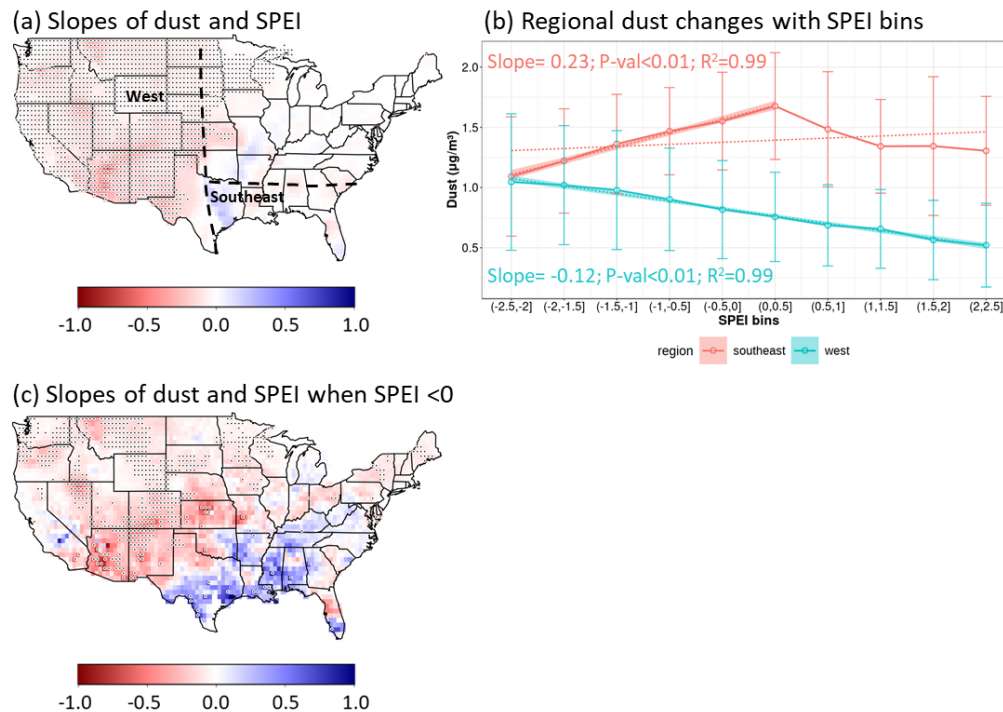

**Figure R1:** (a) Linear regression slopes between fine dust concentrations and SPEI. Black dots denote the grids with regression significance at a 95% confidence level. Dash lines mark the boundaries of the west and southeast regions. (b) Regional average dust varies with SPEI bins over the west and southeast with error bars indicating one standard deviation. Dash lines display linear regression results with shadings showing the 95% confidence level. The numbers indicate the slopes (Slope), P-values (P-val), and the determination coefficient (R<sup>2</sup>) of the regression using all the SPEI bins in the west and only the first six bins in the southeast. (c) Same as a, but using the data with SPEI < 0 only.

(3). From line 207-209, please elaborate on why these exact thresholds (30% or 70% etc.) are used. Consider putting appropriate references.

**Response:** We examined the percentage of grids covered by D2-D4 over the SEUS in increasing order (Figure R2a). There appears to be a ‘turning point’ at around 30%, after which the percentage increases much faster. This indicates a regional expansion of severe drought events. Therefore, we selected 30% as the threshold of regional severe drought events. Most of the weeks have 30%-60% of grids under N0 or D0-D1. In some weeks, the percentage of grids under N0 and D0-D1 can be quite close (e.g., 50% and 47%). To avoid the inclusion of these weeks into the non-drought conditions and reduce the impact of mild drought (D0-D1), we decided to set 70% as the threshold of regional non-drought events. The threshold of 30% of the grids under D2-D4 is nearly at the top 20% quantile of all the weeks. To match this, we select the 20% quantile of regional-mean SPEI as the threshold for regional severe drought events on a monthly

scale. Months with regional-mean SPEI greater than the 20% quantile are considered as non-drought events.

We also tested the results of using other thresholds by reproducing the differences of MODIS AOD (Figure R2b; USDM-based) and dust extinction coefficient (Figure R2c; SPEI-based) between severe drought and non-drought events the same as those in Figure 4 (new Figure 5). The signal of reduced dust under droughts is consistent, which means the threshold selection does not significantly affect the conclusions. These explanations were added in the main text between Line 233-245. Figure R2 was also included in the supplement file as Figure S4.

(a) Percentage of grids under D2-D4 in increasing order and the corresponding percentage of grids under N0 and D0-D1

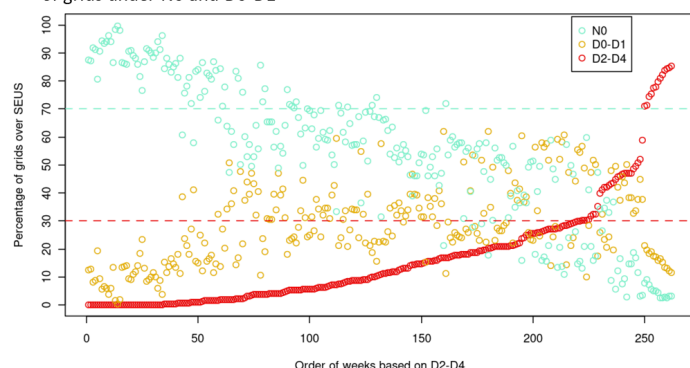

(b) MODIS AOD changes using different thresholds of severe drought and non-drought

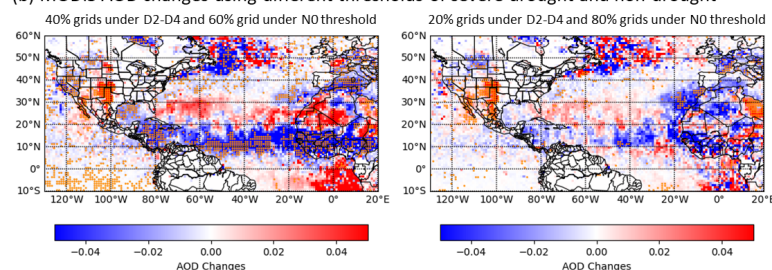

(c) Dust extinction coefficient changes using different thresholds of severe drought and non-drought

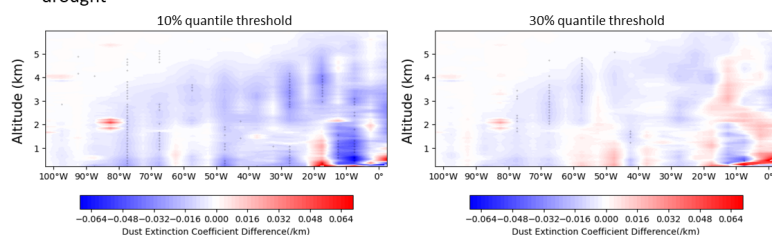

**Figure R2:** (a) Percentage of grids under severe drought (D2-D4; red dots) in increasing order and the corresponding percentage of grids under non-drought (N0; blue dots) and mild drought (D0-D1; orange dots). (b) MODIS AOD difference between severe drought and non-drought events if more than 40% grids are under D2-D4 (severe drought) and more than 60% grids are under N0 (non-drought; left column), or more than 20% grids are under D2-D4 (severe drought) and more than 80% grids are under N0 (non-drought; right column). (c) Dust extinction coefficient difference between severe drought and non-drought events if the regional-mean SPEI is greater (severe drought) and smaller (non-drought) than 10% quantile (left column) or 30% quantile (right column). Black or orange dots in b and c indicate the significant difference at a 95% confidence level.

(4). In figure 4b, why does the difference figure show 2 contrasting bands? Is it possible that the pathway shifted northward? What does the spatial map look like for severe drought conditions?

**Response:** Thanks for raising a good point. The spatial maps of AOD under non-drought, severe drought and the difference between these two are shown in Figure R3a. It is difficult to discern whether the transport pathway shifts norward through eyeballing these maps. Thus, we investigated three meridional cross sections of AOD from 0 to 30°N averaged across the longitudes near the source region (Section 1; 20°W-30°W), in the middle of the pathway (Section 2; 50°W-60°W), and over the Gulf of Mexico (Section 3; 85°W-95°W) in Figure R3b. Indeed, Section 1 and 2 show that the peak AOD values are lower under severe droughts with their corresponding latitudes moving 2° and 1° northward, respectively. However, almost all the AOD values in Section 3 are lower under severe drought than non-drought conditions with no such northward movement observed. This indicates the enhanced dust band between 20°N-30°N does not enter the Gulf of Mexico and reach the SEUS, thus not offsetting the reduced dust in the SEUS under severe drought. The old Figure 4a was separated as an individual new Figure 4. The old Figure 4b-c and Figure R3b were combined as new Figure 5 with the associated discussion added in Line 262-271.

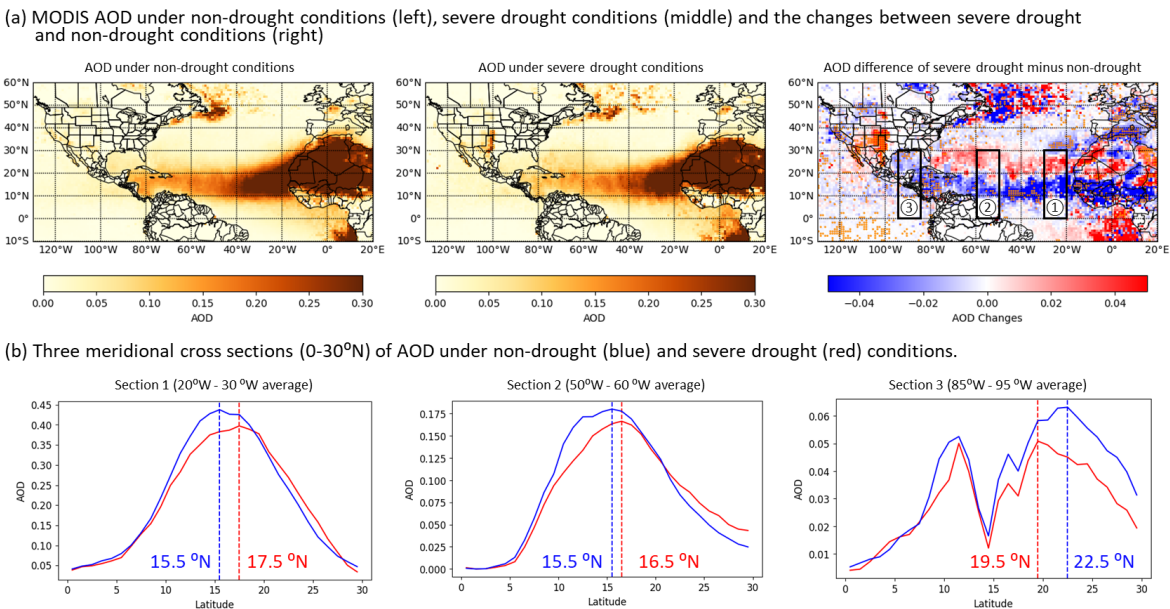

**Figure R3:** (a) Average of MODIS AOD under non-drought conditions (left column), severe drought conditions (middle column), and the difference between severe and non-drought conditions (right column). (b) Meridional cross sections between 0-30°N averaged near the source region (section 1; 20°W-30°W), in the middle of the transport pathway (section 2; 50°W-60°W), and over the Gulf of Mexico (section 3; 85°W-95°W) under non-drought (blue) and severe drought (red) conditions. The dash lines and associated numbers indicate the latitudes with the maximum values of AOD. These three sections correspond to the black boxes and numbers in a (right column) to show their locations.

At low levels, the lower than normal and the northeastward retreat of Bermuda High (BH) as shown by the edge of BH in the new Figure 6a is partly responsible for the northward shift of the dust transport pathway. Such changes in BH fail to steer the enhanced dust flow into SEUS because the western flank of BH is less extended relative to non-drought conditions. Near the source region of the Sahara, the enhanced 10m winds shown in new Figure 8b are meant to increase the emissions of dust particles, which can then be transported westwards by stronger winds at the 600 hPa level near the Sahara ( new Figure 6b). These changes are opposite to those

near the source region of the Sahel, thus causing two contrasting bands. These explanations were added to Line 308-309, 345-346, and 366-367 to fit into the context of the manuscript.

(5). Consider adding the number of realizations used in the CMIP6 model evaluation. I think the readers would be interested to see a model ensemble mean response as well in Figure 8 (even though there are only 4 models and probably 10 realizations).

**Response:** It is a good suggestion to add ensemble means in the evaluation. However, we did not find any ensembles of these four models under the AerChemMIP project with prescribed sea surface temperature settings (histSST). That is why we did not include ensembles initially. The Atmospheric Model Intercomparison Project (AMIP) project is reported to have more ensembles (Zhao et al., 2021). Surprisingly, six more models were found after we changed the searching variable name from ‘scondust’ (surface dust concentration) to ‘mmrdust’ (dust mass ratio at all model layers), even though only one of them (NorESM2-LM) has ensembles (two members). We added these six models to the evaluation with the surface dust extracted from the lowest model layer. All the related texts and figures were updated and GISS-E2-1-G still performs the best in capturing the drought-dust sensitivity when the SEUS is under droughts.

## **Reviewer #2**

### General Comments:

Fine surface dust in the southeastern U.S. is known to increase during summer months due to long-range transport of North African dust to the region. This manuscript investigates dust-drought relationships in the region and changes in large-scale atmospheric variability and teleconnections with drought and dust transport to the SEUS. Evaluation of global transport models against observations also elucidates the ability of models to capture these connections during severe drought periods. The manuscript is well-organized and written, and is an important contribution to the literature. I suggest publishing after minor corrections based on the comments below.

### Specific Comments:

Line 97: Can the authors provide more details regarding completeness criteria for including data from these sites? How do the different sampling periods at some sites (6-day vs 3-day) affect daily interpolations? Also, additional sites come online during this period (2000-2019), did the authors only use sites that were operating during the entire period? Adding sites for different years could bias the results from year to year. How did the authors treat the bias between the CSN and IMPROVE dust concentrations when combining the data? (e.g., Hand et al., 2012; Gorham et al., 2021).

**Response:** Thanks for pointing out the dust measurement bias between the CSN and IMPROVE network. Indeed, Hand et al. (2012) reported a 32% lower dust concentration at the collocated IMPROVE sites than CSN sites and concluded the urban-to-rural dust comparison should be approached with caution. We have removed the CSN sites from the analysis and the revised paper uses IMPROVE sites only. Since IMPROVE sites are sampled every 3 days consistently across all sites, the sampling frequency is not an issue anymore.

To investigate the effect of changes in sites as the reviewer pointed out, we compared three ways of treating IMPROVE data: (1) using all the available IMPROVE sites (IMPROVE\_raw), (2) using IMPROVE sites with at least a 5-year (IMPROVE\_5year) data record, and (3) using

IMPROVE sites with at least a 10-year data record (IMPROVE\_10year). We examined the mean differences and interannual correlation coefficients (R) between the three datasets in Figure R4. Higher mean differences and lower R values can be seen between the IMPROVE\_5year and IMPROVE\_raw datasets over part of Georgia, Nevada, and Washington states, where the IMPROVE sites with less than 5-year data are located. By contrast, the IMPROVE\_5year and IMPROVE\_10year datasets have a good agreement, as suggested by the near-zero mean differences and near-one R over almost all the grids. Thus, we chose to use the IMPROVE\_5year dataset and redid all the associated analyses. We added some texts in Line 98-110 to explain this and inserted Figure R4 in the supplement file as Figure S1.

(a) Mean difference of dust during 2000-2019 JJA

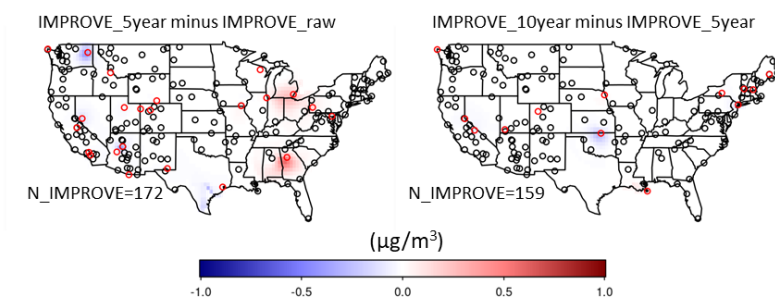

(b) Interannual correlation coefficient (R) of dust during 2000-2019 JJA

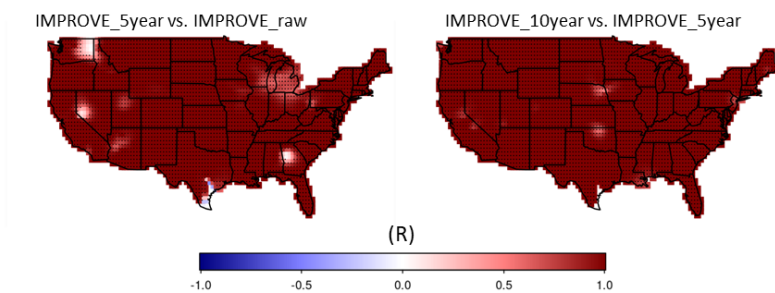

**Figure R4:** Dust mean differences (a) and interannual correlation coefficients (b) between the datasets interpolated from the IMPROVE sites with a data record of more than 5 years (IMPROVE\_5year) and all the IMPROVE sites with data available (IMPROVE\_raw) during the study period (left column), and between the IMPROVE sites with a data record of more than 10 years (IMPROVE\_10year) and IMPROVE\_5year (right column). N\_IMPROVE in a indicates the number of sites (black circles) used for the IMPROVE\_5year (left) and IMPROVE\_10year (right) datasets, respectively. Red circles in a show the sites used for the IMPROVE\_raw dataset but not for the IMPROVE\_5year (left; 23 sites), and for the IMPROVE\_5year dataset but not for the IMPROVE\_10year (right; 13 sites). These red circles are included to help better understand the changes.

Line 117: From 1996 until when?

**Response:** From 1996 until the present. The sentence was modified accordingly. We used the period of 2000-2019 JJA as denoted in Table S1.

Line 134: If am I understanding correctly, under extreme drought conditions the data for each site could correspond to different days?

**Response:** Yes. The drought conditions of the sites and grids are spatially and temporally matched with USMD data.

Line 157: The shifts in Figure S1 appear different for both CONUS (severe drought is shifted further) and for the SEUS, it is not shifted as much. Can the authors elaborate?

**Response:** For the CONUS, the dust changes at the IMPROVE sites are similar between Figure 1 (USDM-based) and Figure S1 (SPEI-based) with an increase of the mode and mean value by  $\sim 0.13 \mu\text{g}/\text{m}^3$  and  $\sim 0.3 \mu\text{g}/\text{m}^3$ , respectively. It appears that the monthly data shifts further because its narrower x-axis range makes the change more evident. However, the dust changes are indeed smaller in the SEUS on a monthly scale than on a weekly scale, which can be explained by the episodic nature of the African dust transport events. It typically takes about ten days for the African dust to reach the SEUS (Chen et al., 2018; Pu and Jin, 2021). Thus, weekly data is supposed to capture such events better than monthly data, in which high dust values will be averaged out by low values when no dust event occurs. To further explain this, we examine the weekly and monthly time series of dust at the OKEF1 site in the SEUS (Figure R5). Dust on a weekly scale shows higher variabilities than that on a monthly scale with the maximum dust reaching  $10 \mu\text{g}/\text{m}^3$ . When a fast-developing drought changes severity within a month, the monthly dust average will dampen the difference between drought and non-drought conditions. We added this discussion to Line 161-164.

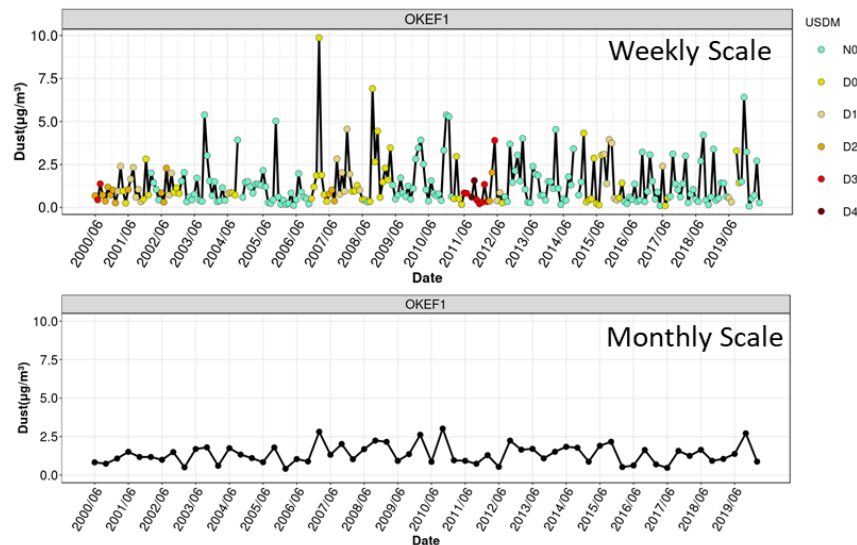

**Figure R5:** Weekly (top) and monthly (bottom) time series of dust at the OKEF1 (82.12°W, 30.74°N) IMPROVE sites. Dots in the weekly time series are color-coded by USDM.

Line 170: I am not sure I follow the reasoning for conducting the linear regression only using the lowest four SPEI bins. It would seem that the reasoning for doing this should apply to both the west and the east. Otherwise, it appears the data points are being ignored to get the desired results.

**Response:** As suggested by the other reviewer (2<sup>nd</sup> comment), we recalculated the slopes using drought conditions only (SPEI < 0) at each grid box in Figure R1c. More SPEI bins were added as well to increase the data points used for regression. Most of the grids in the western US still show negative slopes and more grids in the SEUS show positive slopes compared to the results of using all the data. More texts were added in Line 184-199 of the revised manuscript to better explain this.

Line 187: How did the authors determine how the southeast region is defined with the box shown in Figure 1a? How did they decide on the lat/lon limits or sites to include?

**Response:** The selection of the southeastern region boundary is to cover most of the grids/sites with negative dust changes under severe droughts as shown in Figure 1a. On the other hand, the boundary cannot be extended to the further north because African dust barely reaches the northern US where local or even Asian dust plays a more important role (Aldhaif et al., 2020). To better explain this, we compared the dust changes under non-drought and severe drought after expanding the northern boundary to 36°N and 39°N, respectively (Figure R6). Dust shows little changes in the boundary of [100°W-75°W; 25°W-36°W] and increases in the boundary of [100°W-75°W; 25°W-39°W]. This further verifies that our boundary selection is correct to capture the reduced dust signal. The explanation was added to Line 154-157 in the manuscript with Figure R6 inserted as Figure S2 in the supplement file.

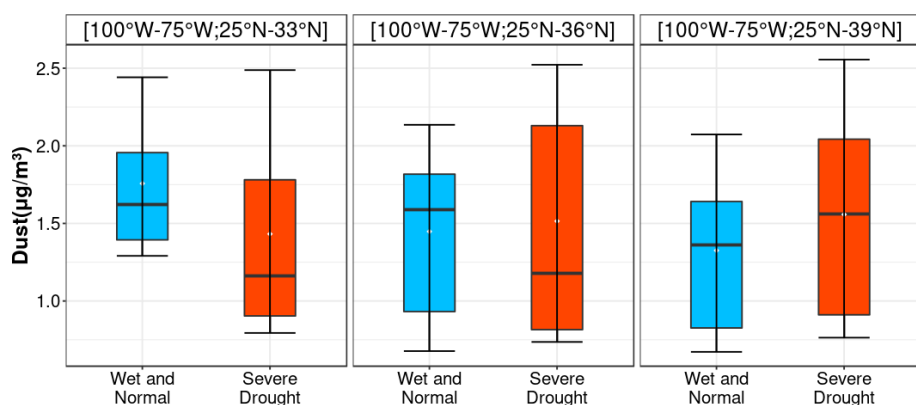

**Figure R6:** Boxplots of dust using three different delimitations of southeastern US (SEUS) under wet and normal (non-drought) and severe drought conditions.

Line 207: How were these particular limits chosen?

**Response:** The same question was also asked by the other reviewer, and we reproduce the responses below.

We examined the percentage of grids covered by D2-D4 over the SEUS in increasing order (Figure R7a). There appears to be a ‘turning point’ around 30%, after which the percentage increases much faster. This indicates a regional expansion of severe drought events. Therefore, we selected 30% as the threshold of regional severe drought events. Most of the weeks have 30%-60% of grids under N0 or D0-D1. In some weeks, the percentage of grids under N0 and D0-D1 can be quite close (e.g., 50% and 47% ). To avoid the inclusion of these weeks into the non-drought conditions and reduce the impact of mild drought (D0-D1), we decided to set 70% as the threshold of regional non-drought events. The threshold of 30% of the grids under D2-D4 is nearly at the top 20% quantile of all the weeks. To match this, we select the 20% quantile of regional-mean SPEI as the threshold for regional severe drought events on a monthly scale. Months with regional-mean SPEI greater than the 20% quantile are considered as non-drought events.

We also tested the results of using other thresholds by reproducing the differences of MODIS AOD (Figure R7b; USDM-based) and dust extinction coefficient (Figure R7c; SPEI-based)

between severe drought and non-drought events the same as those in Figure 4 (new Figure 5). The signal of reduced dust under droughts is consistent, which means the threshold selection does not significantly affect our conclusions. These explanations were added in the main text between Line 233-245. Figure R7 was also included in the supplement file as Figure S4.

(a) Percentage of grids under D2-D4 in increasing order and the corresponding percentage of grids under N0 and D0-D1

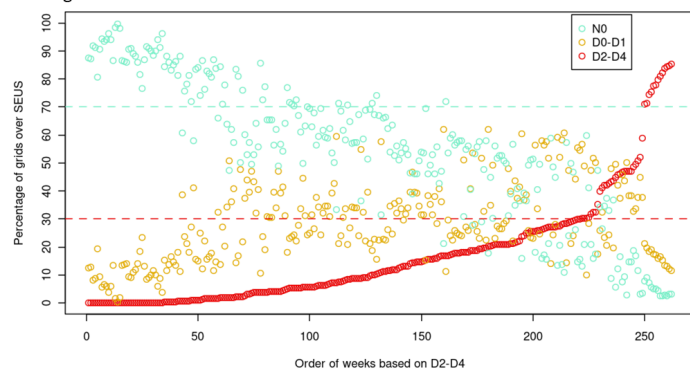

(b) MODIS AOD changes using different thresholds of severe drought and non-drought

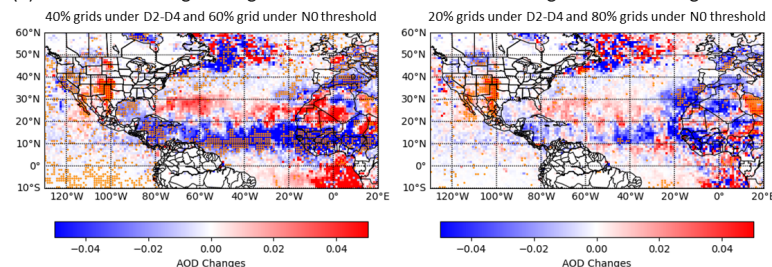

(c) Dust extinction coefficient changes using different thresholds of severe drought and non-drought

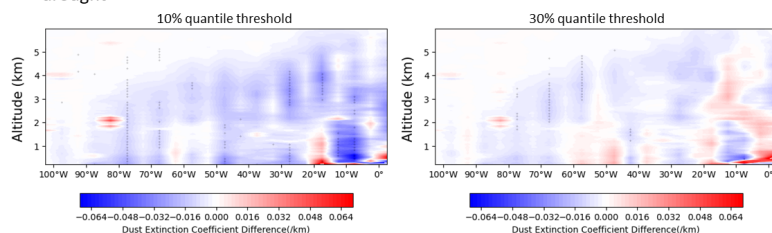

**Figure R7:** (a) Percentage of grids under severe drought (D2-D4; red dots) in increasing order and the corresponding percentage of grids under non-drought (N0; blue dots) and mild drought (D0-D1; orange dots). (b) MODIS AOD difference between severe drought and non-drought events if more than 40% grids are under D2-D4 (severe drought) and more than 60% grids are under N0 (non-drought; left column), or more than 20% grids are under D2-D4 (severe drought) and more than 80% grids are under N0 (non-drought; right column). (c) Dust extinction coefficient difference between severe drought and non-drought events if the regional-mean SPEI is greater (severe drought) and smaller (non-drought) than 10% quantile (left column) or 30% quantile (right column). Black or orange dots in b and c indicate the significant difference at a 95% confidence level.

Line 207: It also helps clarity of writing to include the opposite description in the text and not just parentheses (here and other places in the manuscript and captions), such as “Regional severe drought (non-drought)”. Unless there are page limits and space issues, it causes more effort to understand than to just write it out.

**Response:** Good suggestion and we revised the related sentences and figure captions.

Line 212: Are these droughts limited to the SEUS region mentioned above?

**Response:** Yes. We specified this in the sentence.

Line 214: How was this AOD limit chosen?

**Response:** The AOD value of 0.15 is about 20% quantile of all the values in the red box of Figure 4b (new Figure 5a). After a second thought, we decided not to specify a value and changed the sentence to ‘higher AOD values than its surroundings’ in Line 258.

Line 259: Can the authors comment regarding the years with severe droughts that aren’t associated? Such as 2000, 2006, and 2019?

**Response:** The reason for the years that are not closely associated with strong negative NAO is that NAO is not the only factor causing drought conditions in the SEUS. Another factor widely reported by previous studies is the cold phase of El Niño and the Southern Oscillation (ENSO), also known as La Niña (e.g., Piechota and Dracup, 1996; Cook et al., 2007). La Niña in 2000 and 2006 is linked with the fast-developing droughts in the SEUS by Chen et al. (2019) despite the NAO index is not too strong. In summer 2019, ENSO was in its warm phase (CPC, 2022), which may counteract the effects of negative NAO and result in non-drought conditions. By contrast, both La Niña and negative NAO occurred in 2011 and cause severe drought events in the SEUS (Pu et al., 2016). Although many other factors contribute to the SEUS droughts, the abnormal circulation patterns related to the negative phase of NAO are closely linked with the African dust transport, and thus we focus on NAO in this study. These explanations were added to Line 323-330 in the revised manuscript.

Line 319: Include units with 4.76.

**Response:** Done. We also rewrote the model evaluation section by adding more models suggested by the other reviewer (5<sup>th</sup> comment).

Line 331: Typo: “unite”

**Response:** Done.

Line 355: It may be less confusing to write this as the conditions that caused reduced transport of dust also correspond to periods with drought conditions (so it doesn’t seem that drought conditions in the SE are somehow causing less dust transport from Africa). The description in line 359-361 clarifies this but it could be misinterpreted here.

**Response:** We changed the sentence to “we investigated how drought conditions in the SEUS can be linked with the trans-Atlantic transport of African dust” so that it does not seem to imply a causal relationship.

Figure 1: Include JJA in the caption for part (a). Are the results shown in part (b) also for JJA?

**Response:** Yes. Both are during JJA months, and we added the JJA period to the caption.

Figure 2: Typo for part (b): “reginal”. Do these results correspond to all time periods?

**Response:** The typo was corrected. The time period is 2000-2018 JJA, which is the shared period between dust and SPEI data. We added this time period in the caption.

Figure 3: Why were only IMPROVE data used (not CSN)?

**Response:** We changed to use IMPROVE sites only in the revised manuscript.

Figure 4: Typo in legend of part (a): “sever”. Also, typo in caption: “Carrabin”. Include the wavelength of AOD in the caption.

**Response:** The typos are corrected and the wavelength of AOD (550nm) was also added.

Figure 5: Are these changes based on severe droughts only in the SEUS region? What years are included in this figure?

**Response:** Yes. These changes are based on the USDM-based regional drought events during 2000-2019 JJA as displayed in the time series of new Figure 4. The period was added in the caption.

Figure 6: Include time periods in caption.

**Response:** Done.

Figure 7: Include time periods in caption.

**Response:** Done.

Figure 8: Line 306 states JJA but this legend reads “all months”. What is the time period? Include time period in caption. Also include that the dashed line corresponds to 1:1.

**Response:** “JJA months” is the correct one. The legend was changed to ‘all JJA months’. The time period is 1973-2014 JJA, which was added to the caption together with the 1:1 dashed line.

Table 1: Include time period in caption

**Response:** Done.

### **References:**

Aldhaif, A. M., Lopez, D. H., Dadashazar, H., and Sorooshian, A.: Sources, frequency, and chemical nature of dust events impacting the United States East Coast, *Atmos. Environ.*, 231, 117456, <https://doi.org/10.1016/j.atmosenv.2020.117456>, 2020.

Chen, L. G., Gottschalck, J., Hartman, A., Miskus, D., Tinker, R., and Artusa, A.: Flash Drought Characteristics Based on U.S. Drought Monitor, *Atmosphere*, 10, 498, <https://doi.org/10.3390/atmos10090498>, 2019.

Chen, S.-P., Lu, C.-H., McQueen, J., and Lee, P.: Application of satellite observations in conjunction with aerosol reanalysis to characterize long-range transport of African and Asian dust on air quality in the contiguous U.S., *Atmos. Environ.*, 187, 174–195, <https://doi.org/10.1016/j.atmosenv.2018.05.038>, 2018.

Cook, E. R., Seager, R., Cane, M. A., and Stahle, D. W.: North American drought: Reconstructions, causes, and consequences, *Earth-Sci. Rev.*, 81, 93–134, <https://doi.org/10.1016/j.earscirev.2006.12.002>, 2007.

CPC, 2022. Cold and Warm Episodes by Season.

[http://www.cpc.ncep.noaa.gov/products/analysis\\_monitoring/ensostuff/ensoyears.shtml](http://www.cpc.ncep.noaa.gov/products/analysis_monitoring/ensostuff/ensoyears.shtml)

Duniway, M. C., Pfennigwerth, A. A., Fick, S. E., Nauman, T. W., Belnap, J., and Barger, N. N.: Wind erosion and dust from US drylands: a review of causes, consequences, and solutions in a changing world, *Ecosphere*, 10, e02650, <https://doi.org/10.1002/ecs2.2650>, 2019.

Gorham, K. A., Raffuse, S. M., Hyslop, N. P., and White, W. H.: Comparison of recent speciated PM<sub>2.5</sub> data from collocated CSN and IMPROVE measurements, *Atmos. Environ.*, 244, 117977, <https://doi.org/10.1016/j.atmosenv.2020.117977>, 2021.

Hand, J. L., Schichtel, B. A., Pitchford, M., Malm, W. C., and Frank, N. H.: Seasonal composition of remote and urban fine particulate matter in the United States, *J. Geophys. Res. Atmospheres*, 117, <https://doi.org/10.1029/2011JD017122>, 2012.

Piechota, T. C. and Dracup, J. A.: Drought and Regional Hydrologic Variation in the United States: Associations with the El Niño-Southern Oscillation, *Water Resour. Res.*, 32, 1359–1373, <https://doi.org/10.1029/96WR00353>, 1996.

Pu, B. and Jin, Q.: A Record-Breaking Trans-Atlantic African Dust Plume Associated with Atmospheric Circulation Extremes in June 2020, *Bull. Am. Meteorol. Soc.*, 102, E1340–E1356, <https://doi.org/10.1175/BAMS-D-21-0014.1>, 2021.

Pu, B., Fu, R., Dickinson, R. E., and Fernando, D. N.: Why do summer droughts in the Southern Great Plains occur in some La Niña years but not others?, *J. Geophys. Res. Atmospheres*, 121, 1120–1137, <https://doi.org/10.1002/2015JD023508>, 2016.

Zhao, A., Ryder, C. L., and Wilcox, L. J.: How well do the CMIP6 models simulate dust aerosols?, *Atmospheric Chem. Phys. Discuss.*, 1–32, <https://doi.org/10.5194/acp-2021-578>, 2021.

# Reduced surface fine dust under droughts over the southeastern United States during summertime: observations and CMIP6 model simulations

Wei Li<sup>1</sup> and Yuxuan Wang<sup>1</sup>

<sup>1</sup>Department of Earth and Atmospheric Sciences, University of Houston, Houston, Texas, USA.

*Corresponding author:* Yuxuan Wang (ywang246@central.uh.edu)

**Abstract.** Drought is an extreme hydroclimate event that has been shown to cause the increase of surface fine dust near source regions, yet the drought-dust relationship in regions predominantly influenced by long-range transported dust such as the southeastern US (SEUS) has received less attention. Using long-term surface fine dust observations, weekly US Drought Monitor (USDM), and monthly Standardized Precipitation-Evapotranspiration Index (SPEI), this study unmasks spatial disparity in drought-dust relationships in the contiguous US (CONUS) where the SEUS shows a decrease in surface dust concentrations during drought in contrast to the expected increase in dust found in other CONUS regions. Surface fine dust was found to decrease by  $\sim 0.23 \mu\text{g}/\text{m}^3$  with a unit decrease of SPEI in the SEUS, as opposed to an increase of  $\sim 0.12 \mu\text{g}/\text{m}^3$  in the west. The anomalies of dust elemental ratios, satellite aerosol optical depth (AOD), and dust extinction coefficients suggest that both the emissions and trans-Atlantic transport of African dust are weakened when the SEUS is under droughts. Through the teleconnection patterns of negative North Atlantic Oscillation (NAO), a lower than normal and more northeastward displacement of the Bermuda High (BH) is present during SEUS droughts which results in less dust being transported into the SEUS. At the same time, enhanced precipitation in the Sahel associated with the northward shift of the Intertropical Convergence Zone (ITCZ) leads to lower dust emissions therein. Of the ten selected models participating in the sixth phase of the Coupled Model Intercomparison Project (CMIP6), GISS-E2-1-G was found to perform the best in capturing the drought-dust sensitivity in the SEUS. This study reveals the mechanism of how droughts influence aerosol abundance through changing long-range transport of dust.

## 1 Introduction

Mineral dust plays an important role in the climate system by modifying the Earth's energy budget through direct aerosol-radiation forcing and indirect aerosol-cloud interactions (Tegen et al., 1996; Sassen, 2002; Carslaw et al., 2010). Fine mode mineral dust with an aerodynamic diameter of less than 2.5  $\mu\text{m}$  can be transported over long distances and has a wide-ranging socioeconomic effect such as degeneration of air quality, disruption of public transport by poor visibility, and reduction of soil productivity (Middleton, 2017). Dust events can also be linked with a higher risk of valley fever and other respiratory and cardiovascular diseases (Karanasiou et al., 2012; Tong et al., 2017), and more non-accidental mortality (Crooks et al., 2016). Lifted by strong winds from arid and bare land, dust particles in the atmosphere are significantly modulated by hydroclimate variables, such as precipitation, temperature, relative humidity, and soil moisture (Achakulwisut et al., 2017; Brey et al., 2020; Pu and Ginoux, 2018). Thus, drought, as a recurring hydroclimate extreme, can impose large changes on the abundance of dust particles in the atmosphere. As the contiguous United States (CONUS) is prone to droughts and projected to be warmer and dryer in the future (Cook et al., 2015), it is essential to quantify the drought-dust relations and evaluate the ability of climate models to capture such relations to better understand the climate-dust feedbacks.

Most of the previous studies of drought-dust sensitivity in the US focused on the southwest (Aarons et al., 2019; Achakulwisut et al., 2018, 2019; Arcusa et al., 2020; Borlina and Rennó, 2017; Kim et al., 2021) where the major dust emission sources are located (e.g. the Chihuahuan, Mojave, and Sonoran Deserts). For example, Achakulwisut et al. (2018) quantified an increase of fine dust by 0.22–0.43  $\mu\text{g}/\text{m}^3$  with a unit decrease of two-month Standardized Precipitation-Evapotranspiration Index (SPEI) over the US southwest across the seasons. Both observations (Aarons et al., 2019) and simulations (Kim et al., 2021) have shown that dust enhancement under droughts can be attributed to the simultaneous increase of local dust emissions and long-range transport of dust from Asia. The observed drought-dust relationship can be used as a process-level metric to evaluate dust simulation in coupled chemistry-climate models and Earth system models. For example, a recent evaluation of dust emissions in 19 models participating in the sixth phase of the Coupled Model Intercomparison Project (CMIP6) found that interannual variations of dust emissions simulated by these models are strongly correlated with drought over major dust source regions (Aryal and Evans, 2021).

While the abovementioned studies improved our understanding of dust-drought relationships in dust source areas, regions predominantly influenced by long-range transported dust such as the southeastern US (SEUS) have received less attention. The dusty Saharan air from western Africa can reach the SEUS during boreal summer through long-range transport across the tropical Atlantic Ocean and Caribbean Basin (e.g., Perry et al., 1997; Prospero et al., 2010). Fine dust is estimated to contribute to 20-30% of the total particulate matter smaller than 2.5  $\mu\text{m}$  ( $\text{PM}_{2.5}$ ) aerodynamic diameter at the surface in the southeast during summertime (Hand et al., 2017). Extreme “Godzilla” dust events have occurred in recent years, leading to considerably worse air quality in the southeast region (Yu et al., 2021). In our previous study, Wang et al. (2017) estimated that growing-season (March-October) droughts during 1990-2014 caused an average fine dust increase of 27% in the west and 16% in the Great Plains, with a much lower effect on fine dust

in the southeastern and northeastern US. That study used a coarse time scale (i.e., averaging of the eight-month growing season) which may not fully capture the episodic nature of dust emissions or dust transport.

Here we improve upon previous studies by using drought and dust datasets of better spatial coverage and finer temporal scales (Section 2). In Section 3.1, we first examine how the spatial distributions of surface fine dust change with weekly and monthly drought indices over the CONUS. The finer-scale analysis unmasks spatial disparity in drought-dust relationships where the SEUS stands out from the rest of CONUS in that it shows a decrease in surface dust concentrations during drought in contrast to the expected increase in dust found in other regions. We then focus on the southeast, an area largely overlooked by prior studies of dust response to drought, and investigate in Section 3.2 how drought conditions in the SEUS affect the trans-Atlantic transport of African dust.

Among the surface dust measurement datasets examined in this study, the Barbados site located in the eastmost of the Caribbean Windward Islands is the only long-term site on the main outflow pathway of African dust to the SEUS, which is suitable to evaluate dust-drought relationships simulated by coupled climate-chemistry models. The surface dust mass concentration has been continuously measured at the Barbados site since August 1965. This rare and unique dataset was widely used to improve our understanding of the variations of African dust transport and model evaluations (Chiapello et al., 2005; Prospero and Nees, 1986; Zuidema et al., 2019). Given the correct sensitivity of dust emissions to drought in CMIP6 models (Aryal & Evans, 2021), in Section 3.3 we use the dust-drought relationship at the Barbados site to evaluate the performance of ~~ten-four~~ CMIP6 models in capturing the drought-dust sensitivity in the SEUS.

## 2 Data and Methods

The datasets and related variables used in this study were summarized in Table S1-2 with details given below.

### 2.1 Drought indicator

The US Drought Monitor (USDM) index was selected as the primary drought indicator because it incorporates not only objective indicators but also inputs from regional and local experts around the country (Svoboda et al., 2002). USDM maps have been released every week from 2000 to the present on its website (<https://droughtmonitor.unl.edu/>). There are five dryness categories on the map, labeled Abnormally Dry (D0), Moderate (D1), Severe (D2), Extreme (D3), and Exceptional (D4) Drought. We converted these maps into  $0.5^\circ \times 0.5^\circ$  gridded data and combined D2-D4 levels as “severe drought” due to limited data availability caused by their low spatial coverage if treated individually (Li et al., 2022). Non-drought (wet and normal) conditions, denoted as N0, are defined when a grid is not under any of the five dryness categories. There are 262 weeks in total during our study period from 2000 to 2019 summers (June, July, August; JJA). To compensate for the categorical nature of the USDM data, one-month gridded SPEI data from the global SPEI database (<http://sac.csic.es/spei/>) with a spatial resolution of  $0.5^\circ \times 0.5^\circ$  and a temporal range of 1973-2018 was also used to conduct statistical analysis (e.g., correlation and regression). The criteria of  $\text{SPEI} < -1.3$  and

SPEI > -0.5 were applied to denote severe drought and non-drought conditions, respectively, as suggested by Wang et al. (2017).

## 2.2 Surface dust and satellite products

To expand the spatial coverage, we created a gridded daily fine dust dataset ( $\pm 0.5^\circ \times \pm 0.5^\circ$ ) that aggregates site-based observations from ~~both US Environmental Protection Agency Chemical Speciation Network (EPA-CSN) and the~~ Interagency Monitoring of Protected Visual Environments (IMPROVE) networks using the modified inverse distance weighting method as done by Schnell et al., (2014). ~~These two Fine dust data from the IMPROVE sites sets have~~ been widely used by previous studies to investigate surface fine dust variations (Achakulwisut et al., 2017; Hand et al., 2017; Kim et al., 2021). US Environmental Protection Agency Chemical Speciation Network (EPA-CSN) also provides long-term dust data, but the CSN sites are located primarily in suburban and urban areas, hence including extreme values from urban environments which may confound the drought signals. In addition, CSN network uses different sampling practices and analytical methods from IMPROVE which can lead to systematic differences in dust measurements (Hand et al., 2012b; Gorham et al., 2021). Thus, we only used IMPROVE dataset in this study. To reduce the artifact caused by different data completeness (e.g., old sites retired and new sites started), we selected the sites with data records longer than 5 years during the study period for interpolation (Figure S1). ~~The gridded dust data was further remapped through bilinear interpolation to match the spatial resolution of the USDM and SPEI data.~~ We used the latest version of total surface dust data at the Barbados site (Figure 5a) created and published by Zuidema et al. (2019). The Barbados JJA monthly data was averaged from at least 20 daily samples in each month between 1973 and 2014.

We combined Level3 daily aerosol optical depth AOD (550nm) retrieved from Moderate Resolution Imaging Spectroradiometer (MODIS) aboard Aqua (MYD07\_D3 v6.1) and Terra (MOD08\_D3 v6.1) with a resolution of  $1^\circ \times 1^\circ$  from 2003 to 2019 (Payra et al., 2021; Pu and Jin, 2021) to examine the westward transport of African dust. Level3 monthly cloud-free dust extinction coefficients at 532nm between 2006 and 2019 from Cloud-Aerosol Lidar and Infrared Pathfinder Satellite Observation (CALIPSO) satellite were also used to analyze the vertical profiles of trans-Atlantic dust plumes. The CALIPSO data was obtained from <https://asdc.larc.nasa.gov/project/CALIPSO> with a  $2^\circ \times 5^\circ$  horizontal grid and a vertical resolution of 60 m up to 12km from the ground.

## 2.3 Meteorological data

To analyze the emission and transport of African dust, several meteorological variables were applied. Daily precipitation was taken from the Global Precipitation Climatology Project version 1.3 (GPCP V1.3). The data is a satellite-based global product from 1996 to the present with a  $1^\circ \times 1^\circ$  spatial resolution. Other variables, including zonal (U) and meridional (V) winds, and geopotential height at different pressure levels were from the European Centre for Medium Range Weather Forecast (ECMWF) reanalysis version5 (ERA5) dataset. Weekly data was averaged from hourly data with a resolution of  $0.25^\circ \times 0.25^\circ$ . Monthly North Atlantic Oscillation (NAO) data was

obtained from the Climate Research Unit (CRU) calculated as the difference of normalized sea-level pressure between the Azores and Iceland (Jones et al., 1997).

## 2.4 CMIP6 AerChemMIP models

~~Four~~Ten models from the CMIP6 Aerosol Chemistry Model Intercomparison Project (AerChemMIP) were selected: BCC-ESM1, CESM2-WACCM, CNRM-ESM2-1, EC-Earth3-AerChem, GFDL-ESM4, GISS-E2-1-G, MIROC6, MRI-ESM2-0, NorESM2-LM, and UKESM1-0-LL. They are the only models found by the time of writing with surface dust mass ratio outputs from historical simulations with prescribed sea surface temperature in the AerChemMIP project. NorESM2-LM is the only model containing ensembles (two members) and the ensemble mean was used here. All the model outputs cover the period from 1850 to 2014. Dust emissions are interactively calculated based on factors such as surface wind speed, soil type, and aridity. Dust particles are resolved to different size bins ranging from 0.01 to 63  $\mu\text{m}$  in diameter. More information and references (Dunne et al., 2020; Kelley et al., 2020; Séférian et al., 2019; Yukimoto et al., 2019; Wu et al., 2020; Danabasoglu et al., 2020; van Noije et al., 2021; Tatebe et al., 2019; Seland et al., 2020; Senior et al., 2020) for each model are listed in Table S2.

## 3 Results

### 3.1 Reduced dust in the southeast under droughts

Figure 1a shows the mean summertime (JJA 2000 – 2019) surface fine dust concentrations under non-drought conditions (N0) and their changes under severe droughts (D2-D4) relative to non-drought. Higher concentrations ( $\sim 2 \mu\text{g}/\text{m}^3$ ) can be found in the southwest and southeast regions under non-drought conditions, reflecting the average spatial distributions of summertime dust. Under severe droughts, most of the grids/sites display an enhanced dust level, with the highest enhancement ( $\sim 1.5 \mu\text{g}/\text{m}^3$ ) occurring near the source regions in the southwest (e.g., Arizona and New Mexico). This indicates higher local dust emissions under droughts, which can be attributable to regional precipitation, bareness, wind speed, and soil moisture anomalies (Achakulwisut et al., 2017; Kim et al., 2021; Pu and Ginoux, 2018). By contrast, reduced fine dust is shown in the southeastern grids/sites under severe drought, especially for the ones near the coast. Density plots in Figure 1b illustrate that the overall gridded dust distributions under severe droughts across the CONUS move towards the high end compared with non-drought conditions, with an increase of the mode and mean value by  $\sim 0.142 \mu\text{g}/\text{m}^3$  (26%) and  $\sim 0.210 \mu\text{g}/\text{m}^3$  (27%), respectively. Conversely, dust distributions over the southeast ( $25^\circ\text{--}33^\circ\text{N}$ ,  $100^\circ\text{--}75^\circ\text{W}$ ; black box in Figure 1a) move to the low end with a respective decrease of the mode and mean value by  $\sim 0.2644 \mu\text{g}/\text{m}^3$  (18%) and  $\sim 0.1623 \mu\text{g}/\text{m}^3$  (11%). Here the southeast region is delimited to cover most of the grids/sites with negative changes in dust during drought. Expanding the region's boundary northward will dampen the reduced dust signal or even change it to an increase (Figure S2) due to the weakened impact of African dust to the northern US (Aldhaif et al., 2020). To test whether the spatial interpolation process could potentially cause biases due to the low site numbers over the southeast region, Figure 1b also plots the density distribution using on-site IMPROVE data. Similar distributions can be seen between the gridded and on-site data, except that the latter shows a “fatter” (more variable) distribution. This indicates that the interpolation did not

significantly affect the results. We also reproduced the above analysis using SPEI-based monthly drought criteria and similar results were found (Figure S3), except for a smaller magnitude of dust reduction in the SEUS. This indicates the weekly data can better capture the reduced dust signal than monthly data because of the episodic nature of the African dust transport, which typically takes about ten days to reach the SEUS (Chen et al., 2018; Pu and Jin, 2021).

(a) Dust distribution under non-drought conditions (left) and its changes from severe drought conditions (right)

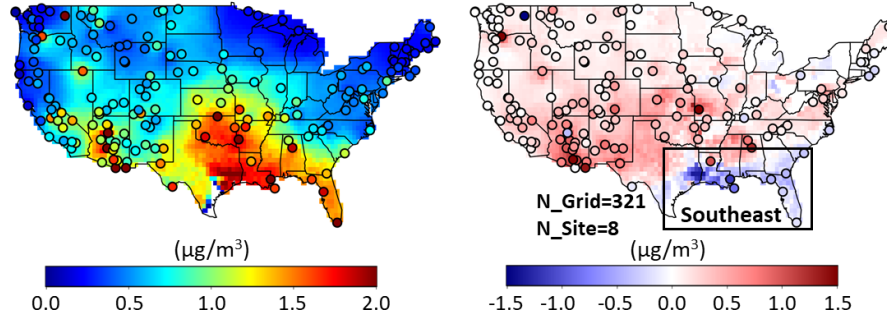

(b) Dust density plot over the CONUS (left) and the southeast region (right)

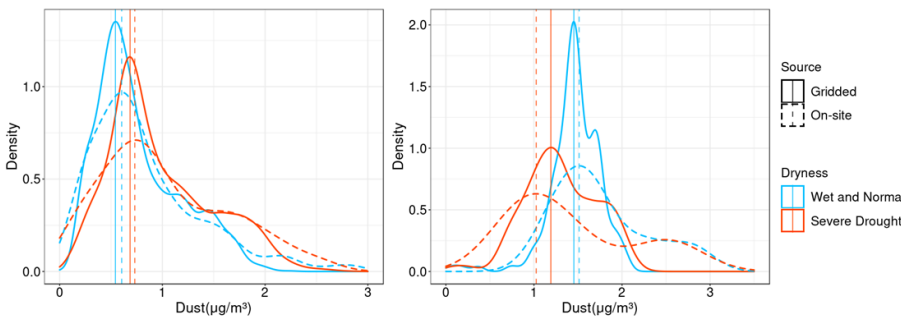

**Figure 1. (a) Maps of the mean gridded and in-situ (dots) fine dust under USDM-based non-drought (wet and normal) conditions (left) from 2000 to 2019 JJA and its changes from severe drought conditions (right). The number of grids and (sites) within the southeast region are denoted by N\_Grid and (N\_Site, respectively). (b) Comparisons of density distributions of gridded (solid lines) and in-situ (dash lines) fine dust concentrations during 2000-2019 JJA under drought (red lines) and non-drought (blue lines) conditions over the CONUS (left) and southeast region (right), respectively. Vertical dash and solid lines indicate the modes.**

~~We also reproduced the above analysis using SPEI based monthly drought criteria and similar results were found (Figure S1). The consistency indicates the drought-dust relationship can be captured on both a weekly and monthly scale.~~ To further quantify the drought-dust relationship, we conducted a linear regression between SPEI and dust concentrations, taking advantage of the non-categorical nature of SPEI. The slopes of the regression at each grid are shown in Figure 2a. Almost all the grids in the western CONUS have significant negative slopes at a 95% confidence level. As negative SPEI values indicate drought, these negative slopes reveal an increasing level of dust with dryer conditions. The highest value about  $0.6 \mu\text{g}/\text{m}^3$  per unit decrease of SPEI occurs in Arizona, which is also indicative of higher dust emissions under drought consistent with the composite analysis in Figure 1. However, not all the grids in the southeast exhibit significant positive slopes as expected from Figure 1. This may imply a non-linear relationship that cannot be identified via composite analysis. To better explain this, we compared the changes in regional mean dust concentrations with SPEI bins between the southeast (as defined in Figure 1) and west ( $100^\circ\text{W}$  westwards) in

Figure 2b. We first calculated the average dust concentration by grid for each SPEI bin and then averaged grid-mean dust per SPEI bin to get the regional-mean dust concentration. The SPEI bins were selected so that the number of grids at each SPEI bin is greater than 160 (~50% out of 321 grids) over the SEUS to ensure a good regional coverage. As shown in Figure 2b, the regional-mean approach reveals a clear nonlinear pattern for the southeast with dust decreasing as the absolute value of SPEI increases in both wet (SPEI > 0.5) and dry (SPEI < 0) portions. By contrast, the west exhibits a linear relationship throughout the SPEI range. While both regions are consistent under non-drought conditions (SPEI > 0) where dust concentrations decrease with increasing wetness due to increased washout, they diverge under drought conditions (SPEI < 0). In the western US, dust concentrations follow the expected pattern of being higher with increasing dryness because of the dominance of local dust emissions, which are linearly related to aridity (Duniway et al., 2019). To capture the nonlinear relationship in the SEUS, we conducted the linear regression using only the lowest six SPEI bins under dry conditions (SPEI < 0.5). The resulting regression slope is 0.2349  $\mu\text{g}/\text{m}^3$  per unit of SPEI for the southeast and -0.125  $\mu\text{g}/\text{m}^3$  per unit of SPEI for the west, respectively. In light of the regional-mean analysis, we recalculated the slopes at each grid under drought conditions only (SPEI < 0) in Figure 2c. Compare to Figure 2a, more grids in the SEUS show a positive slope between surface dust and SPEI while the negative slope still dominates in the rest of CONUS. Most grids with statistically significant positive slopes are found near the coast (e.g., southern Texas and Louisiana). As SPEI is more negative with increasing dryness, the positive slope in the southeast means a decrease of dust with increasing dryness which is consistent with the result from Figure 1 based on USDM. Hereafter we focused on the southeast region and investigated why surface fine dust in this region shows an opposite response to droughts compared with other CONUS regions.

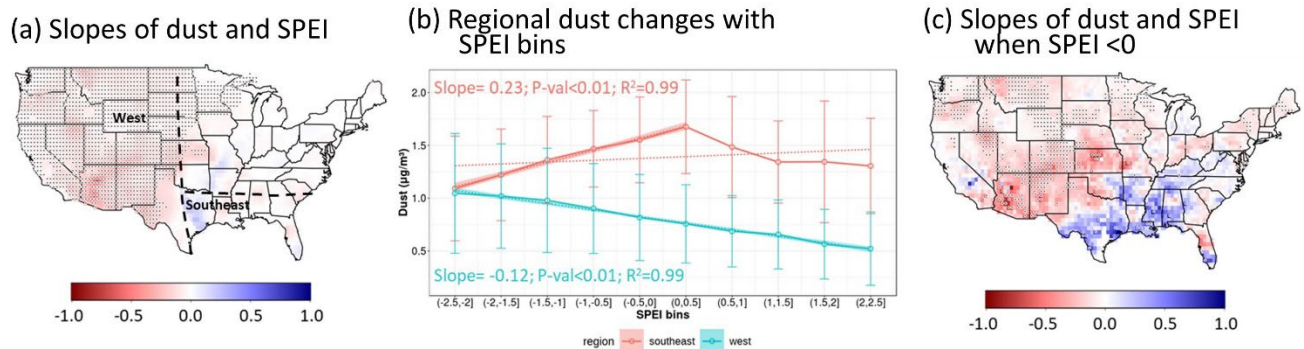

**Figure 2. (a) Maps of the linear regression slopes between fine dust concentrations and SPEI during 2000-2018 JJA. Black dots denote the grids with regression significance at a 95% confidence level. Dash lines mark the boundaries of the west and southeast regions. (b) Regional average dust varies with SPEI bins over the west and southeast with error bars indicating one standard deviation. Dash lines display linear regression results with shadings showing the 95% confidence level. The numbers indicate the slopes, P-values (P-val), and determination coefficient ( $R^2$ ) of the regression using all the SPEI bins in the west and only the first six bins in the southeast.**

Dust elemental ratios contain important information signifying the dust particle origins (e.g., local or transport). African dust, relative to Asian and local dust, normally has higher Fe:Ca (> 1.50) and Al:Ca (> 2.60) ratios, and lower K:Fe (< 1.10) and Si:Al (< 2.90) ratios (Aldhaif et al., 2020; Gonzalez et al., 2021; VanCuren and Cahill, 2002). Based on these reported thresholds, we analyzed dust elemental observations at eight sites within the southeast region (Figure

1a) and compared how the elemental ratios changed under severe drought based on the USDM drought indicator. The results are displayed in Figure 3, with more statistical descriptions listed in Table S3. Under non-drought conditions (wet and normal), the ratios are generally within the typical ranges mentioned above, indicating the dominance of African dust over Asian dust and locally-emitted dust as reported by other studies (Aldhaif et al., 2020; VanCuren and Cahill, 2002). Under severe drought, Fe:Ca and Al:Ca become lower; K:Fe and Si:Al become higher. All these changes are in the direction of reducing the characteristic elemental ratios of African dust. Most of the Fe:Ca, Al:Ca, and K:Fe ratios under severe drought have their medians falling below the reported thresholds of African dust. This indicates a significantly reduced dust source from Africa. As dust deposition is unlikely to increase under drought conditions, the lower signature of African dust in surface dust under severe drought is most likely attributable to the reduced import of African dust to the SEUS, which is discussed below.

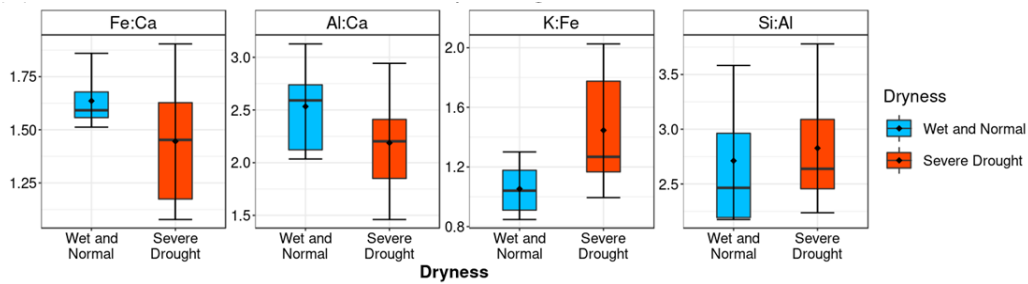

**Figure 3. Boxplots of four dust elemental ratios under non-drought (wet and normal) and severe drought conditions. Observations are from eight IMPROVE sites in the southeast region shown in Figure 1a. The upper and lower whiskers of the boxplots represent the ninth and first quantile, respectively. Black dots indicate the mean values. Detailed values of this figure can be found in Table S3.**

### 3.2 Weakened trans-Atlantic dust transport under droughts

In this section, we examined how the trans-Atlantic transport of African dust changes with droughts in the southeast. To do so, we first selected regional-scale drought events to better depict the aridness across the southeast, and then associated these events with the long-range transport of African dust and compared them with regional-scale non-drought events. On a weekly scale (USDM-based), we first examined the percentage of grids covered by D2-D4 droughts over the SEUS in an increasing order (Figure S4a). There appears to be a ‘turning point’ at around 30%, after which the percentage increases much faster, suggesting a regional expansion of severe drought. Therefore, we selected regional severe drought events based on the threshold of more than 30% of the southeastern grids under D2-D4 droughts. Figure S4a also shows that the percentages of grids under N0 or D0-D1 fall between 30% and 60% in most of the weeks and they can be quite close (e.g., 50% under N0 and 47% under D0-D1) in some weeks. To exclude such weeks from non-drought conditions and reduce the impact of mild drought (D0-D1), we set the threshold of regional non-drought events as more than 70% of the southeastern grids under N0. To select regional severe drought events on a monthly scale (SPEI-based), we used the threshold of the lowest 20% quantile of regional-mean SPEI since the criteria of 30% of the grids under D2-D4 is nearly at the top 20% quantile of all the weeks. Months with regional-mean SPEI greater than the top 20% quantile are considered as non-drought events. We tested other thresholds of

selecting severe droughts and non-droughts events and found consistent results in the difference of dust under severe drought relative to non-drought events (Figure S4b-c), which indicates our conclusions are not sensitive to the selection of these thresholds. Regional severe drought (non drought) events were identified when more than 30% (70%) of the southeastern grids are under D2-D4 (N0) on a weekly scale (USDM based), or when the regional mean SPEI is within (out of) the lowest 20% percentile during the study period (dependent on data records) on a monthly scale (SPEI based). The time series in Figure 4a shows that the regional severe drought events mainly occurred in 2000, 2006, 2007, and 2011 JJA.

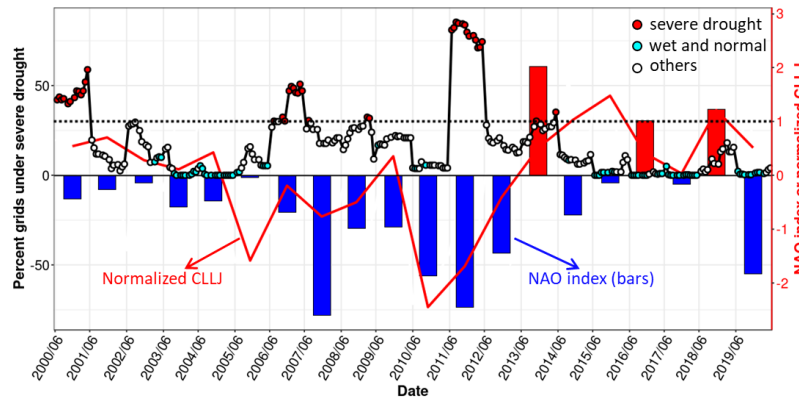

**Figure 4. Time series of weekly regional dryness levels indicated by the percentage of grids under severe drought (D2-D4) in the southeast area (filled dots; left axis), the JJA-mean North Atlantic Oscillation (NAO) index (bars; right axis), and normalized Caribbean low-level jet (CLLJ; red line; right axis). The black dash line indicates the position of 30%.**

Based on the selected regional drought and non-drought periods in the SEUS, we compiled the composite AOD from MODIS for drought and non-drought conditions. Figure 5a displays the maps of non-drought mean AOD and the changes in AOD during severe droughts. Horizontally, the major transport pathway of the dusty African air is within  $10^{\circ}$ - $20^{\circ}$ N,  $100^{\circ}$ - $0^{\circ}$ W (red box), as indicated by the higher AOD values greater than its surroundings  $0.15$ . The dust flow, emitted from northern Africa (e.g., Sahara Desert and Sahel), travels through the tropical Atlantic, the Caribbean Sea, and the Gulf of Mexico before reaching the SEUS. Under droughts, almost all the AOD values along that pathway show negative differences, which indicates both the African dust transport and emissions (mainly from the Sahel) are depressed when the SEUS is under droughts. In addition, the difference map presents an enhanced dust band to the north of the major transport pathway ( $20^{\circ}$ N- $30^{\circ}$ N), which is indicative of the northward shift of the transport pathway. To further explore this, we compared in Figure 5b three meridional cross sections of AOD between  $0$  and  $30^{\circ}$ N averaged over different longitudinal portions of transport pathway: near the source region (Section 1;  $20^{\circ}$ W- $30^{\circ}$ W), in the middle of the pathway (Section 2;  $50^{\circ}$ W- $60^{\circ}$ W), and over the Gulf of Mexico (Section 3;  $85^{\circ}$ W- $95^{\circ}$ W). Section 1 and 2 show that the peak AOD values are lower under severe droughts with their corresponding latitudes moving  $2^{\circ}$  and  $1^{\circ}$  northward, respectively. However, almost all the AOD values in section 3 are lower under severe drought than non-drought conditions with no such northward movement observed. This indicates the enhanced dust band between  $20^{\circ}$ N- $30^{\circ}$ N does not enter the Gulf of Mexico and reach the SEUS, hence not offsetting the reduced dust in the SEUS under severe drought.

To better demonstrate the dust changes along the major transport pathway, we also examined the vertical profiles of the dust extinction coefficient from CALIPSO along the pathway (Figure 5c). Since the CALIPSO data is monthly, we used the SPEI-based drought events defined above. The dust particles can be injected up to ~4km altitude from the source region through strong desert surface heating (Alamirew et al., 2018; Flamant et al., 2007), low-level wind convergence (Bou Karam et al., 2008), synoptic-scale disturbance (Knippertz and Todd, 2010) and other processes (Francis et al., 2020), and then descend to lower levels as they travel westwards. Such vertical structures have been discerned by previous studies (Prospero and Mayol-Bracero, 2013; Ridley et al., 2012). Similar to Figure 5a, a decreased dust extinction coefficient is found along the vertical transport pathway, which verifies the conclusion that both the transport and emissions of African dust are weakened when the SEUS is under droughts.

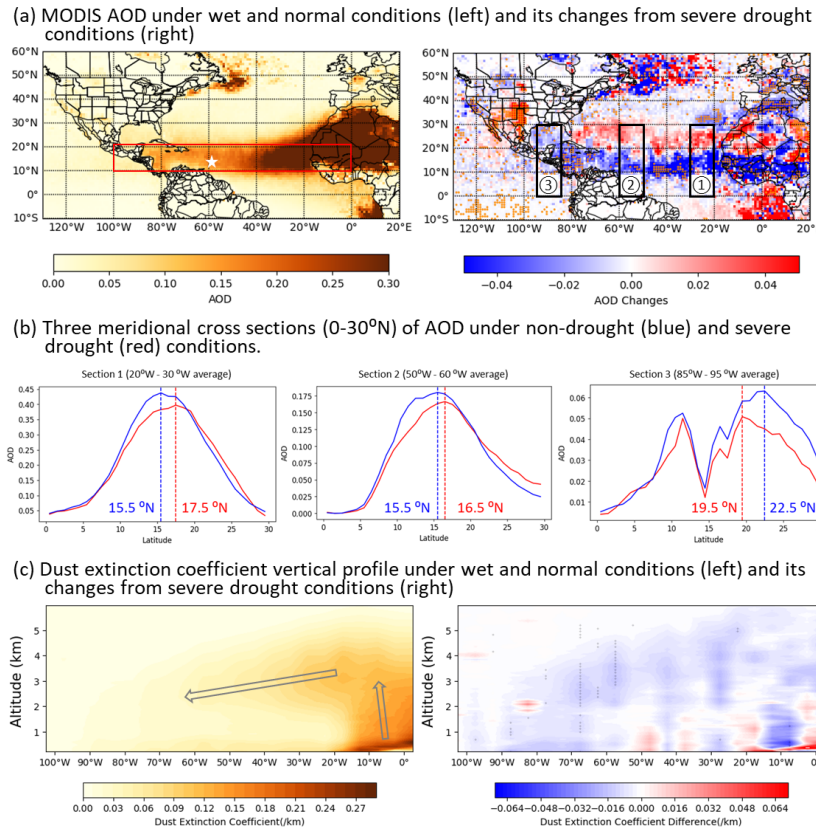

**Figure 5. (a) Maps of AOD (550 nm) under non-drought (wet and normal) conditions (left column) and its changes during severe droughts (right column). The severe drought and non-drought periods were chosen based on the weekly time series shown in Figure 4. The white asterisk denotes the location of the Barbados site (13°6'N, 59°37'W). Black and red rectangles denote the locations of the cross sections in b and c, respectively. (b) Meridional cross sections between 0-30°N averaged near the source region (section 1; 20°W-30°W), in the middle of the transport pathway (section 2; 50°W-60°W), and over the Gulf of Mexico (section 3; 85°W-95°W) under non-drought (blue) and severe drought (red) conditions. The dash lines and associated numbers indicate the latitudes with the maximum values of AOD. These three sections correspond to the black rectangles labeled in the right panel of 5a to show their locations. (c) Mean vertical profiles of dust extinction coefficient during non-drought (left) and severe drought (right) periods across the major transport pathway (red rectangle in a). The severe drought and non-drought periods were chosen based on monthly SPEI between 2006 and 2018. Black or orange dots in a and c (right column) indicate the significant difference at a 95% confidence level relative to non-drought conditions.**

(a) 850 hPa geopotential height and winds

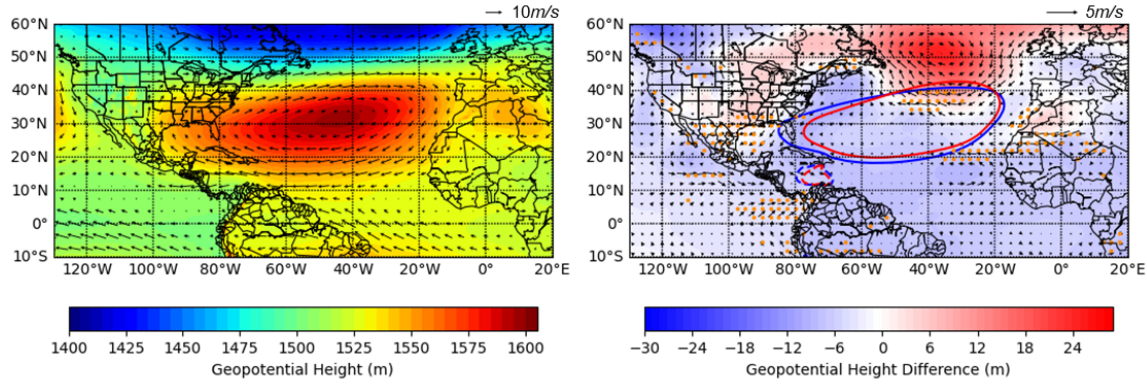

(b) 600 hPa geopotential height and winds

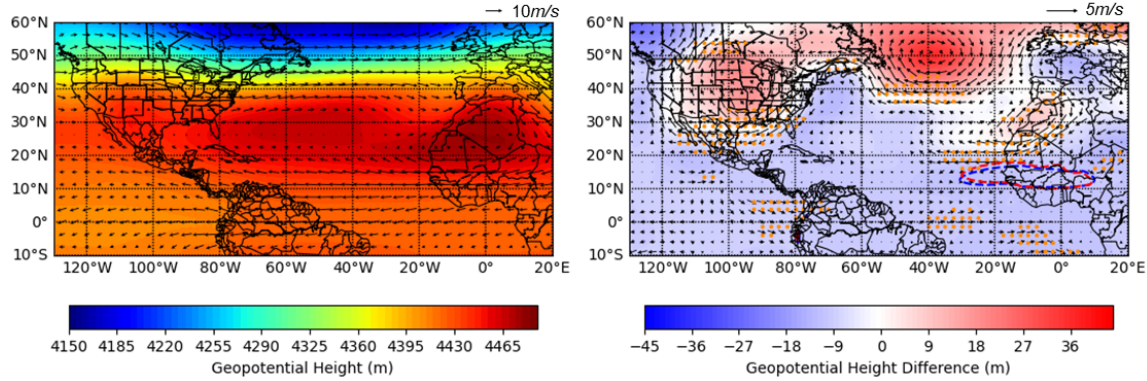

Figure 6. Maps of geopotential height (shadings) and wind vectors (arrows) at 850 hPa (a) and 600 hPa (b) under the USDM-based SEUS regional non-drought (wet and normal) conditions (left column) and their changes during severe drought periods (right column) from 2000 to 2019 JJA. Solid lines in a indicate the edge of Bermuda High under non-drought (blue) and severe droughts (red). Dash lines show the edge of Caribbean low-level jet (a) and African easterly jet (b) under non-drought (blue) and severe droughts (red). Orange dots (right column) indicate the grids with significant differences of zonal winds at a 95% confidence level.

The teleconnections between the SEUS droughts and the transport and emissions of African dust are displayed in Figure 6. At low levels near the central North Atlantic, a semipermanent high-pressure system called North Atlantic Subtropical High (NASH) or Bermuda High (BH) favors the dust transport with its southwestward extensions towards the Caribbean and the Gulf of Mexico steering dust into CONUS (Doherty et al., 2008; Kelly and Mapes, 2011). This can be clearly seen from the anticyclonic wind circulations in Figure 6a. Using the 1560m contour (solid lines in Figure 6a) as the edge of the BH following Li et al. (2011), a retreat of the BH towards the northeast can be recognized under droughts, causing northerly wind anomalies over the Caribbean and the Gulf of Mexico. As the normal winds are southerly, the northerly wind anomalies result in a weakened dust transport into the SEUS. Such wind anomalies can also prevent the enhanced dust band (Figure 5a) from entering the SEUS. Accompanied by the southwestward extension of BH, the Caribbean low-level jet (CLLJ), defined as the mean zonal wind speed at 925 hPa over 11°–17°N, 70°–80°W, is also used to assess the westward transport of dust over the Caribbean Sea (Wang, 2007). The edge of CLLJ is denoted by the 12 m/s zonal wind speed contour (dash lines in Figure 6a). The shrinkage of CLLJ under droughts further verifies the weakened dust transport at low levels.

The geopotential height pattern associated with these circulation and jet changes is a higher than normal subpolar low and lower than normal BH, which is consistent with the negative phase of North Atlantic Oscillation (NAO) (Barnston and Livezey, 1987). A negative phase of NAO has been proven to be teleconnected with dry weather over the SEUS and northern Europe, and wet weather over southern Europe and the Mediterranean due to fewer and weaker storms caused by the reduced pressure gradient between the subtropical high and low (Hurrell, 1995; Visbeck et al., 2001). The time series in Figure 4 show severe drought events (e.g., 2011) are associated with strong negative NAO and abnormally low CLLJ. Similarly, we found both NAO and CLLJ are positively correlated with SPEI over the SEUS (Figure 7a, c) with their corresponding mean magnitude reduced by 0.80 and 1.27 m/s, respectively, compared with non-drought conditions (Figure 7b, d). This further confirms the weakened low-level dust transport into the southeast region. It is also noted in Figure 4 that in some years (e.g., 2000 and 2006) the severe drought is not closely associated with strong negative NAO. The reason is that other processes, such as El Niño and the Southern Oscillation (ENSO) and Pacific Decadal Oscillation (PDO), can also trigger drought conditions over the SEUS (Piechota and Dracup, 1996; Cook et al., 2007; Pu et al., 2016). For example, the cold phase of ENSO, known as La Niña, is linked with the fast-developing droughts over the SEUS in 2000 and 2006 by Chen et al. (2019) despite the NAO index was not too strong in those years. Although many factors contribute to the SEUS droughts, the abnormal circulation patterns related to the negative phase of NAO impose more influence on the African dust transport, and thus we focus on NAO in this study.

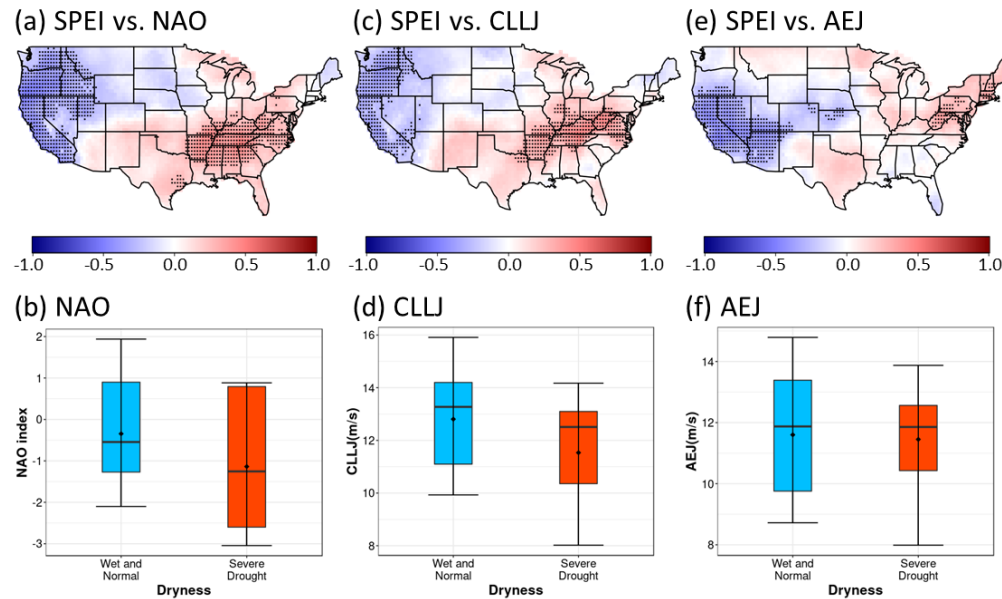

**Figure 7. Map of the correlation coefficient between SPEI and NAO (a), CLLJ (c), and AEJ (e) during 2000-2018 JJA with black dots denoting the significant correlation at a 95% confidence level. And the boxplots of NAO (b), CLLJ (d), and AEJ (f) distributions under non-drought (wet and normal) and severe drought conditions.**

The westward dust propagation at high levels (e.g., at ~3 km altitude) mainly occurs near the source region after being injected from the surface (Figure 5c). The African easterly jet (AEJ), defined as the average zonal wind speed at 600 hPa over the area of 10°–15°N, 30°W–10°E (Cook, 1999), has been widely linked with the transport of the African

dust towards tropical Atlantic (e.g., Jones et al., 2003; Pu & Jin, 2021). Another strengthened high pressure over North Africa (Saharan Anticyclone) at 600 hPa (also seen at 850 hPa) leads to stronger winds to the northern rim of AEJ (Figure 6b). However, the core jet area seems to be less affected as shown by the comparable magnitude of AEJ between non-drought and drought conditions in Figure 7f. The edge of AEJ, denoted by the 11 m/s zonal wind contour (dash lines in Figure 6b), only slightly moves northwards and does not show noticeable expansion or shrinkage. There are no significant correlations between SPEI and AEJ over the SEUS either (Figure 7e), which indicates weak teleconnection between droughts in the SEUS and the dust transport strength at a high level. The abnormally high Saharan Anticyclone at both 850 hPa and 600 hPa (Figure 6a-b) is likely to increase both emissions and transport of dust from the Sahara Desert, thus causing the enhanced dust band (20°N-30°N) in Figure 5a.

#### (a) Precipitation

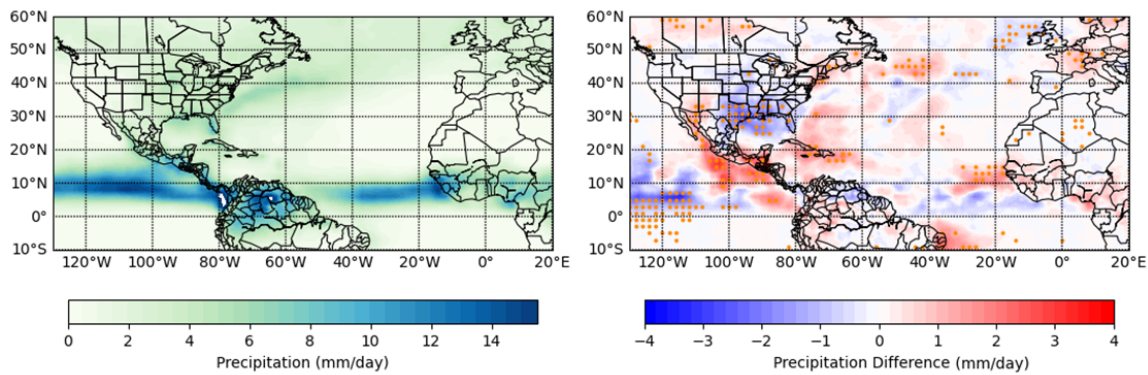

#### (b) 10m wind speed (shading) and direction (arrow)

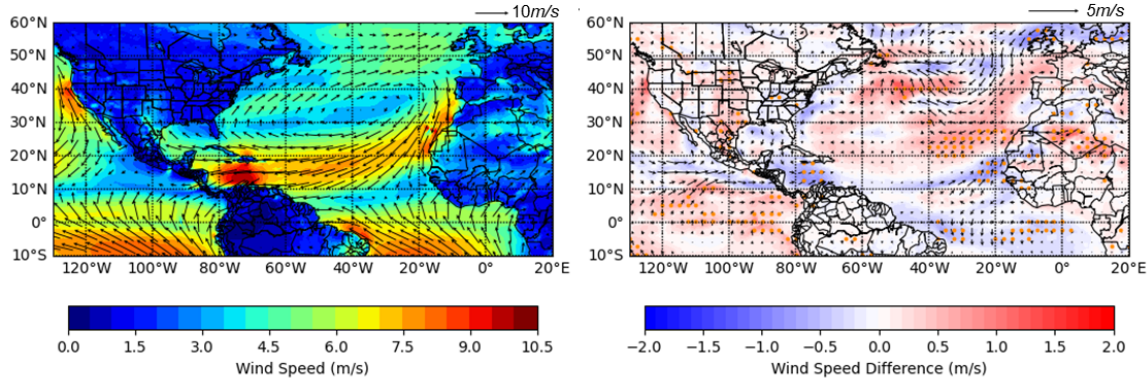

**Figure 8. Maps of precipitation (a) and 10m wind speed (shadings in b) and directions (arrows in b) under the USDM-based SEUS regional non-drought (wet and normal) conditions (left column) and their changes during severe drought periods (right column) from 2000 to 2019 JJA. Orange dots (right column) indicate the grids with significant differences of precipitation (a) and wind speed (b) at a 95% confidence level.**

Precipitation is one of the dominant factors influencing African dust emissions (Moulin and Chiapello, 2004). A maximum precipitation zonal belt near 5°–10°N can be seen under non-drought conditions in Figure 8a, which represents the location of the Intertropical Convergence Zone (ITCZ). We found enhanced precipitation in southern West Africa (10°–20°N, 30°–0°W) and the Caribbean Sea, which will reduce dust emissions from the major source region of Sahel (e.g., southern Mauritania and Mali) and enhance the wet scavenging of dust to the Caribbean Sea. A

significant anticorrelation between summertime Sahel precipitation and NAO has been reported by previous studies on a multidecadal scale (Folland et al., 2009; Linderholm et al., 2009), which is caused by the northward displacement of ITCZ shifting the “rain belt” into the Sahel region in response to a warmer North Atlantic (Sheen et al., 2017; Yuan et al., 2018). By locating the maximum rainfall within 0°–20°N, 30°–0°W following Liu et al., (2020), we found an average of ~0.6° norward movement of ITCZ during the SEUS droughts. This can also be seen from the southwesterly 10m wind anomalies over the same region, which are contradicting to the northeasterly winds under non-drought conditions (Figure 8b). Surface wind speed is another important factor associated with dust emissions in this region (Evan et al., 2016). However, Figure 8b does not show clear negative anomalies over the Sahel region under droughts, which implies that surface wind speed is not a significant factor causing the weakened dust emissions in the Sahel. Instead, stronger winds are found over part of the Sahara (20°–30°N, 5°W–10°E), which would increase the dust emissions therein and contribute to the enhanced dust band displayed in Figure 5a.

In summary, the reduction of surface fine dust in the SEUS under severe drought results from the weakened African dust transport and emissions from the Sahel through the teleconnection patterns of negative NAO. The weaker and less southwestward extension of the BH reduces the wind speed over the Caribbean and the Gulf of Mexico, making it less favorable for African dust to enter the SEUS at low levels. Intensified precipitation over the Sahel related to the northward shift of ITCZ is the main factor causing lower Sahelian dust emissions during the SEUS droughts, and this factor dominates over surface wind speed changes.

### 3.3 CMIP6 model evaluation

In this section, we evaluated the surface dust concentrations from ~~four-ten~~ CMIP6 models regarding their capability of capturing the drought-dust relationships in the SEUS in comparison with the monthly observations (1973-2014; JJA) at the Barbados site. Dust values were extracted from the lowest model layer at a grid point nearest to the observation site. Out of the 120-month study period, 24 severe drought months were identified based on the same SPEI-based regional-drought criteria as described in the last section.

Figure 9a displays the scatter plots between model simulations and observations with more statistics listed in Table 1. CNRM-ESM2-1, EC-Earth3-AerChem, MIROC6, and NorESM2-LM considerably underestimates the dust concentrations by more than ~~1620~~  $\mu\text{g}/\text{m}^3$  (~~780%~~) regardless of the drought conditions. GFDL-ESM4, MRI-ESM2-0, and UKESM-0-LL simulations have a relatively lower underestimation of  $\sim 7 \mu\text{g}/\text{m}^3$  (~~286%~~),  $\sim 5 \mu\text{g}/\text{m}^3$  (18%), and  $\sim 3 \mu\text{g}/\text{m}^3$  (13%), respectively, with the latter being the minimum bias among all the ten models, but they do not reproduce the observed variability as indicated by the negative correlation coefficient (R) and slope. Under droughts, both the underestimations of GFDL-ESM4 and MRI-ESM2-0 are reduced by ~~~38%–50%~~ with R and slope values turning to positive or closer to zero, which indicates ~~these is two models~~ these two models have better performance under droughts. By contrast, the UKESM-0-LL model performs slightly worse if using drought months only, as indicated by the ~3% higher underestimation and the more negative R and slope values. An overall overestimation of  $\sim 7 \mu\text{g}/\text{m}^3$  (29%),  $\sim 9 \mu\text{g}/\text{m}^3$  (36%), and ~~~5~~  $\mu\text{g}/\text{m}^3$  (~~17.9321%~~) was found in the simulations of BCC-ESM1, CESM2-WACCM and GISS-

E2-1-G, respectively. The negative or low ~~A near-zero value of~~ R and slope values (less than 0.25) of these three models also show that they ~~GISS-E2-1-G model~~ can barely capture the dust variability. If only the drought months are considered, all three models ~~GISS-E2-1-G have~~ a better ~~capability model performance~~ in predicting the dust variability with R increasing to 0.18 (BCC-ESM1), 0.25 (CESM-WACCM), and 0.37 (GISS-E2-1-G).

(a) Comparison of monthly observations and simulations

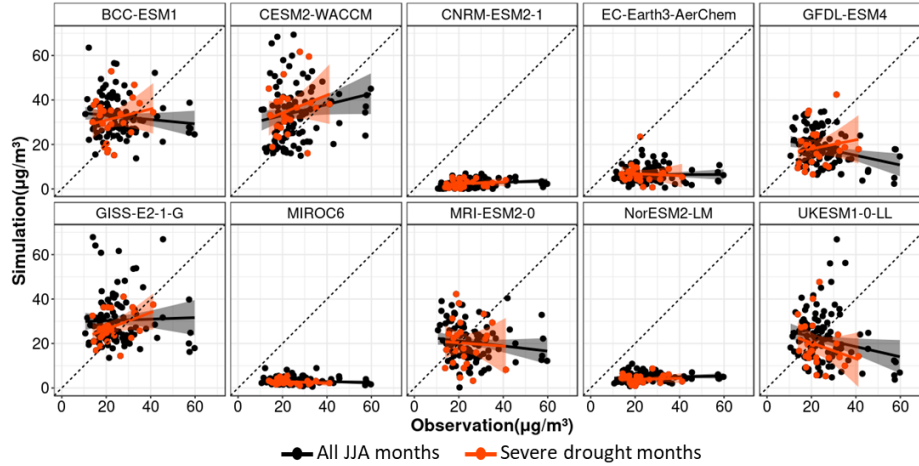

(b) Dust changes with regional-mean SPEI bins

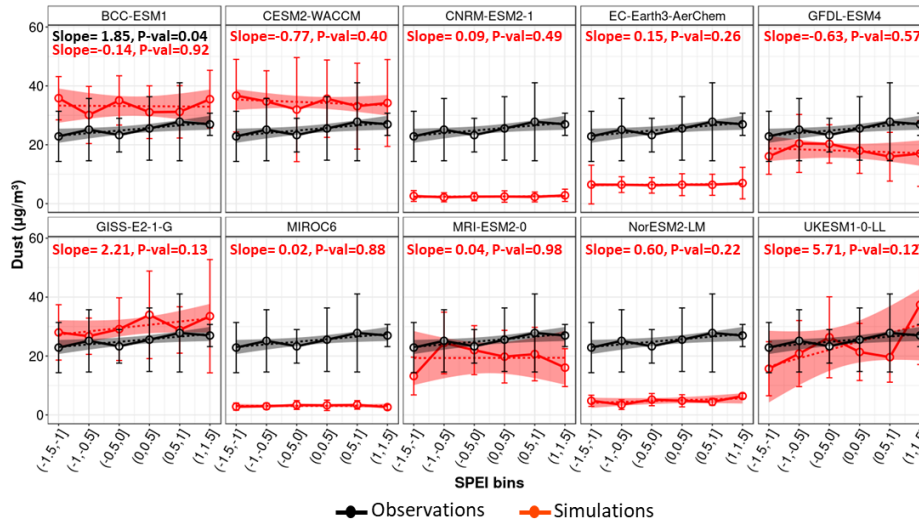

Figure 9. (a) Scatter plots between dust observations and ~~tenfour~~ CMIP6 models ~~during 1973-2014 JJA~~. Black ~~(red)~~ dots and lines represent dust in all ~~the JJA(severe drought)~~ months and their linear regression fits, respectively. ~~Red dots and lines indicate the same analysis but using the SPEI-based severe drought months only~~. The shadings indicate a 95% confidence level of the linear regressions. ~~The dashed lines correspond to the 1:1 correlation~~. (b) Observed and simulated dust means (dots) and standard deviations (error bars) vary with the SEUS regional-mean SPEI. Dash lines represent the linear regressions of the average dust concentrations with their slopes (Slope) and P-values (P-val) listed at the top ~~left~~ ~~corner of each panel~~.

The sensitivity of surface dust in response to the SEUS regional drought was also evaluated ~~by comparing the simulated and observed slopes of dust changes with regional mean SPEI~~ ~~in the same way as Figure 2b~~. The results are

displayed in Figure 9b. Similar to the fine dust responses to drought in the southeast, total dust at Barbados also shows a decreasing tendency with lower SPEI. On average, dust at the Barbados site reduces by 1.85  $\mu\text{g}/\text{m}^3$  with a unit decrease of SPEI over the southeast region. This consolidates the conclusion that the weakened across-Atlantic transport of African dust is the reason causing the reduced fine dust in the SEUS as the Barbados site sits in the major transport pathway. [UKESM-0-LL model shows a much higher sensitivity of 5.71  \$\mu\text{g}/\text{m}^3\$  \(P-value= 0.12\) probably driven by the high dust value under the wettest conditions \(SPEI >1\).](#) GISS-E2-1-G simulations have a comparable sensitivity of 2.21  $\mu\text{g}/\text{m}^3$  (P-value= 0.13) despite its general overestimation, which makes it outperform the other nine models ~~with which all have~~ a much lower and less statistically significant sensitivity in response to SPEI changes.

**Table 1. Evaluation metrics of four CMIP6 models in comparison with observations at the Barbados site [during 1973-2014 JJA](#).** Metrics include correlation coefficient (R), mean bias (MB), normalized mean bias (NMB), root mean square error (RMSE), and slope.

| Simulations       | Drought Conditions | Observed Mean ( $\mu\text{g}/\text{m}^3$ ) | Simulated Mean ( $\mu\text{g}/\text{m}^3$ ) | R     | MB ( $\mu\text{g}/\text{m}^3$ ) | NMB (%) | RMSE ( $\mu\text{g}/\text{m}^3$ ) | Slope |
|-------------------|--------------------|--------------------------------------------|---------------------------------------------|-------|---------------------------------|---------|-----------------------------------|-------|
| BCC-ESM1          | All months         | 25.19                                      | 32.62                                       | -0.11 | 7.43                            | 29.49   | 15.89                             | -0.09 |
|                   | Severe Drought     | 22.94                                      | 31.64                                       | 0.18  | 8.71                            | 37.96   | 13.62                             | 0.25  |
| CESM2-WACCM       | All months         | 25.19                                      | 34.32                                       | 0.17  | 9.13                            | 36.25   | 18.20                             | 0.24  |
|                   | Severe Drought     | 22.94                                      | 35.37                                       | 0.25  | 12.43                           | 54.22   | 16.97                             | 0.40  |
| CNRM-ESM2-1       | All months         | 25.19                                      | 2.42                                        | 0.20  | -22.76                          | -90.36  | 24.75                             | 0.03  |
|                   | Severe Drought     | 22.94                                      | 2.41                                        | 0.17  | -20.53                          | -89.50  | 21.63                             | 0.04  |
| EC-Earth3-AerChem | All months         | 25.19                                      | 6.43                                        | 0.002 | -18.76                          | -74.47  | 21.53                             | 0.001 |
|                   | Severe Drought     | 22.94                                      | 6.71                                        | -0.07 | -16.23                          | -70.75  | 18.26                             | -0.04 |
| GFDL-ESM4         | All months         | 25.19                                      | 18.24                                       | -0.26 | -6.95                           | -27.59  | 15.92                             | -0.21 |
|                   | Severe Drought     | 22.94                                      | 18.60                                       | 0.16  | -4.34                           | -18.92  | 11.18                             | 0.20  |
| GISS-E2-1-G       | All months         | 25.19                                      | 30.43                                       | 0.03  | 5.24                            | 20.79   | 16.19                             | 0.03  |
|                   | Severe Drought     | 22.94                                      | 27.50                                       | 0.37  | 4.56                            | 19.89   | 9.07                              | 0.37  |
| MIROC6            | All months         | 25.19                                      | 3.20                                        | -0.15 | -21.99                          | -87.28  | 24.26                             | -0.02 |
|                   | Severe Drought     | 22.94                                      | 2.85                                        | -0.26 | -20.08                          | -87.58  | 21.36                             | -0.04 |
| MRI-ESM2-0        | All months         | 25.19                                      | 20.62                                       | -0.13 | -4.57                           | -18.15  | 14.90                             | -0.11 |
|                   | Severe Drought     | 22.94                                      | 20.11                                       | -0.05 | -2.83                           | -12.33  | 12.94                             | -0.07 |
| NorESM2-LM        | All months         | 25.19                                      | 4.73                                        | 0.10  | -20.46                          | -81.21  | 22.74                             | 0.02  |
|                   | Severe Drought     | 22.94                                      | 3.95                                        | 0.09  | -18.98                          | -82.75  | 20.22                             | 0.02  |
| UKESM1-0-LL       | All months         | 25.19                                      | 21.96                                       | -0.19 | -3.22                           | -12.80  | 16.96                             | -0.22 |
|                   | Severe Drought     | 22.94                                      | 19.22                                       | -0.24 | -3.71                           | -16.17  | 14.11                             | -0.35 |

In conclusion, [BCC-ESM1, CESM2-WACCM and GISS-E2-1-G](#) generally show an overestimation of surface dust, while the other ~~seven~~ models exhibit an underestimation with the highest underestimation found in the CNRM-ESM2-1, [EC-Earth3-AerChem, MIROC6, and NorESM2-LM](#) simulations. None of the ~~ten~~ models are capable of

capturing the dust variability using all the months. [If using the drought months only, BCC-ESM1, CESM2-WACCM, GFDL-ESM4, GISS-E2-1-G, and MRI-ESM2-0](#) perform [better](#). GISS-E2-1-G can reproduce the dust-SPEI sensitivity much better than the other ~~nine~~<sup>three</sup> models. It is noted that systematic bias should arise when comparing single-site observations with grid-mean predictions, which could presumably cause the between-model diversity as they have different spatial resolutions (Table S2). However, the dust-sensitivity evaluation should be less affected as its calculation depends more on relative changes, instead of absolute values.

## 4 Conclusions

We found an opposite response of surface fine dust to severe droughts between the western and southeastern CONUS, with an increase of  $\sim 0.12 \mu\text{g}/\text{m}^3$  and a decrease of  $\sim 0.23 \mu\text{g}/\text{m}^3$  per unit decrease of SPEI, respectively. Similar results were reached by the USDM-based drought conditions, with an average decrease of  $0.16 \mu\text{g}/\text{m}^3$  under D2-D4 droughts over the SEUS relative to non-drought conditions. The dust and drought relationship over the west/southwest region has been investigated before due to its vicinity to the major dust source regions, and the increase of dust with drought is expected. As the southeast region is strongly influenced by long-range transport of African dust in the summer, we investigated how drought conditions in the SEUS [can be linked with](#) the trans-Atlantic transport of African dust.

The elemental ratios are indicative of the dominance of African dust in the southeast region. The tendency of these ratios moving out of the normal range under severe droughts implies a reduced African dust input. The anomalies of satellite AOD and dust extinction coefficients suggest that both the transport and emissions of African dust are weaker during the southeast drought periods than non-drought periods. The composite analysis reveals that the weaker across-Atlantic dust transport is through the teleconnection patterns of the negative NAO. During the drought periods, a lower than normal and more northeastward displacement of the Bermuda High results in less dust being brought into the SEUS at low levels from the Caribbean and the Gulf of Mexico by its southwestward extensions. This can also be seen from a weaker and more shrinking CLLJ. Enhanced precipitation in the Sahel associated with the northward shift of ITCZ leads to lower dust emissions therein.

At last, we evaluated ~~ten~~<sup>four</sup> CMIP6 models with surface dust outputs. CNRM-ESM2-1, [EC-Earth3-AerChem](#), [MIROC6](#), and [NorESM2-LM](#) generally performs the worst with an up to ~~78~~<sup>80</sup>% underestimation of the dust concentrations. GFDL-ESM4, MRI-ESM2-0, and [UKESM-0-LL](#) underpredict the dust level by ~~28~~<sup>18</sup>%, ~~18~~<sup>7</sup>%, and ~~13~~<sup>26</sup>%, respectively. [BCC-ESM1](#), [CESM2-WACCM](#), and [GISS-E2-1-G](#) shows a ~~respective~~<sup>respective</sup> overestimation of ~~29~~<sup>18</sup>%, ~~36~~<sup>36</sup>%, and ~~21~~<sup>21</sup>%. All ~~ten~~<sup>four</sup> models fail to reproduce the dust variability using data from all the months, with [BCC-ESM1](#), [CESM2-WACCM](#), [GFDL-ESM4](#), [GISS-E2-1-G](#), and [MRI-ESM2-0](#) models significantly improving their performance if only the drought months are used. GISS-E2-1-G outperforms other models in capturing the dust-SPEI sensitivity.

This study establishes how the local- or regional-scale drought conditions in the SEUS are linked with the long-range transport and emission changes of African dust through teleconnections. It also reveals the mechanism of how droughts

influence aerosol abundance through changing long-range transport of dust. Thus, in order to better predict how the local dust air quality will change in response to an increasing drought frequency in a warming climate (Cook et al., 2015), climate and Earth system models not only need to represent various physical processes associated with the entire dust cycle, but also should capture the abnormal atmospheric processes (e.g., circulation and precipitation) related to droughts. Evaluation of these models should use observations of dust-drought relationships not only in dust source regions but also in dust transported regions.

## Acknowledgments

This research was supported by the NOAA's Atmospheric Chemistry, Carbon Cycle, and Climate (AC4) Program (NA19OAR4310177). The authors acknowledge NASA for providing the MODIS AOD and CALIPSO data, EPA and IMPROVE in making the dust observations. We thank individuals and groups for creating the USDM maps and the SPEI dataset. The authors also thank the modelling groups participating in the CMIP6 AerChemMIP project for making the surface dust outputs available.

## Data Availability

The data used for this study can be downloaded through the links provided in Table S1 and Section 2.

## Competing interests

The authors declare that they have no conflict of interest.

## Author contributions

YW conceived the research idea. WL conducted the analysis. Both authors contributed to the preparation of the manuscript.

## References

- Aarons, S. M., Arvin, L. J., Aciego, S. M., Riebe, C. S., Johnson, K. R., Blakowski, M. A., Koornneef, J. M., Hart, S. C., Barnes, M. E., Dove, N., Botthoff, J. K., Maltz, M., and Aronson, E. L.: Competing droughts affect dust delivery to Sierra Nevada, *Aeolian Res.*, 41, 100545, <https://doi.org/10.1016/j.aeolia.2019.100545>, 2019.
- Achakulwisut, P., Shen, L., and Mickley, L. J.: What Controls Springtime Fine Dust Variability in the Western United States? Investigating the 2002–2015 Increase in Fine Dust in the U.S. Southwest, *J. Geophys. Res. Atmospheres*, 122, 12,449–12,467, <https://doi.org/10.1002/2017JD027208>, 2017.
- Achakulwisut, P., Mickley, L. J., and Anenberg, S. C.: Drought-sensitivity of fine dust in the US Southwest: Implications for air quality and public health under future climate change, *Environ. Res. Lett.*, 13, 054025, <https://doi.org/10.1088/1748-9326/aabf20>, 2018.

482 Achakulwisut, P., Anenberg, S. C., Neumann, J. E., Penn, S. L., Weiss, N., Crimmins, A., Fann, N., Martinich, J.,  
 483 Roman, H., and Mickley, L. J.: Effects of Increasing Aridity on Ambient Dust and Public Health in the U.S.  
 484 Southwest Under Climate Change, *GeoHealth*, 3, 127–144, <https://doi.org/10.1029/2019GH000187>, 2019.

485 Alamirew, N. K., Todd, M. C., Ryder, C. L., Marsham, J. H., and Wang, Y.: The early summertime Saharan heat  
 486 low: sensitivity of the radiation budget and atmospheric heating to water vapour and dust aerosol, *Atmospheric*  
 487 *Chem. Phys.*, 18, 1241–1262, <https://doi.org/10.5194/acp-18-1241-2018>, 2018.

488 Aldhaif, A. M., Lopez, D. H., Dadashazar, H., and Sorooshian, A.: Sources, frequency, and chemical nature of dust  
 489 events impacting the United States East Coast, *Atmos. Environ.*, 231, 117456,  
 490 <https://doi.org/10.1016/j.atmosenv.2020.117456>, 2020.

491 Arcusa, S. H., McKay, N. P., Routson, C. C., and Munoz, S. E.: Dust-drought interactions over the last 15,000  
 492 years: A network of lake sediment records from the San Juan Mountains, Colorado, *The Holocene*, 30, 559–574,  
 493 <https://doi.org/10.1177/0959683619875192>, 2020.

494 Aryal, Y. N. and Evans, S.: Global Dust Variability Explained by Drought Sensitivity in CMIP6 Models, *J.*  
 495 *Geophys. Res. Earth Surf.*, 126, e2021JF006073, <https://doi.org/10.1029/2021JF006073>, 2021.

496 Barnston, A. G. and Livezey, R. E.: Classification, Seasonality and Persistence of Low-Frequency Atmospheric  
 497 Circulation Patterns, *Mon. Weather Rev.*, 115, 1083–1126, [https://doi.org/10.1175/1520-0493\(1987\)115<1083:CSAPOL>2.0.CO;2](https://doi.org/10.1175/1520-0493(1987)115<1083:CSAPOL>2.0.CO;2), 1987.

499 Borlina, C. S. and Rennó, N. O.: The Impact of a Severe Drought on Dust Lifting in California’s Owens Lake Area,  
 500 *Sci. Rep.*, 7, 1784, <https://doi.org/10.1038/s41598-017-01829-7>, 2017.

501 Bou Karam, D., Flamant, C., Knippertz, P., Reitebuch, O., Pelon, J., Chong, M., and Dabas, A.: Dust emissions over  
 502 the Sahel associated with the West African monsoon intertropical discontinuity region: A representative case-study,  
 503 *Q. J. R. Meteorol. Soc.*, 134, 621–634, <https://doi.org/10.1002/qj.244>, 2008.

504 Brey, S., Pierce, J., Barnes, E., and Fischer, E.: Estimating the Spread in Future Fine Dust Concentrations in the  
 505 Southwest United States, *J. Geophys. Res. Atmospheres*, 125, <https://doi.org/10.1029/2019JD031735>, 2020.

506 Carslaw, K. S., Boucher, O., Spracklen, D. V., Mann, G. W., Rae, J. G. L., Woodward, S., and Kulmala, M.: A  
 507 review of natural aerosol interactions and feedbacks within the Earth system, *Atmospheric Chem. Phys.*, 10, 1701–  
 508 1737, <https://doi.org/10.5194/acp-10-1701-2010>, 2010.

509 Chen, L. G., Gottschalck, J., Hartman, A., Miskus, D., Tinker, R., and Artusa, A.: Flash Drought Characteristics  
 510 Based on U.S. Drought Monitor, *Atmosphere*, 10, 498, <https://doi.org/10.3390/atmos10090498>, 2019.

511 Chen, S.-P., Lu, C.-H., McQueen, J., and Lee, P.: Application of satellite observations in conjunction with aerosol  
 512 reanalysis to characterize long-range transport of African and Asian dust on air quality in the contiguous U.S.,  
 513 *Atmos. Environ.*, 187, 174–195, <https://doi.org/10.1016/j.atmosenv.2018.05.038>, 2018.

514 Chiapello, I., Moulin, C., and Prospero, J. M.: Understanding the long-term variability of African dust transport  
 515 across the Atlantic as recorded in both Barbados surface concentrations and large-scale Total Ozone Mapping  
 516 Spectrometer (TOMS) optical thickness, *J. Geophys. Res. Atmospheres*, 110,  
 517 <https://doi.org/10.1029/2004JD005132>, 2005.

518 Cook, B. I., Ault, T. R., and Smerdon, J. E.: Unprecedented 21st century drought risk in the American Southwest  
 519 and Central Plains, *Sci. Adv.*, <https://doi.org/10.1126/sciadv.1400082>, 2015.

520 Cook, E. R., Seager, R., Cane, M. A., and Stahle, D. W.: North American drought: Reconstructions, causes, and  
 521 consequences, *Earth-Sci. Rev.*, 81, 93–134, <https://doi.org/10.1016/j.earscirev.2006.12.002>, 2007.

522 Cook, K. H.: Generation of the African Easterly Jet and Its Role in Determining West African Precipitation, *J.*  
523 *Clim.*, 12, 1165–1184, [https://doi.org/10.1175/1520-0442\(1999\)012<1165:GOTAEJ>2.0.CO;2](https://doi.org/10.1175/1520-0442(1999)012<1165:GOTAEJ>2.0.CO;2), 1999.

524 Crooks, J. L., Cascio, W. E., Percy, M. S., Reyes, J., Neas, L. M., and Hilborn, E. D.: The Association between Dust  
525 Storms and Daily Non-Accidental Mortality in the United States, 1993–2005, *Environ. Health Perspect.*, 124, 1735–  
526 1743, <https://doi.org/10.1289/EHP216>, 2016.

527 Danabasoglu, G., Lamarque, J.-F., Bacmeister, J., Bailey, D. A., DuVivier, A. K., Edwards, J., Emmons, L. K.,  
528 Fasullo, J., Garcia, R., Gettelman, A., Hannay, C., Holland, M. M., Large, W. G., Lauritzen, P. H., Lawrence, D. M.,  
529 Lenaerts, J. T. M., Lindsay, K., Lipscomb, W. H., Mills, M. J., Neale, R., Oleson, K. W., Otto-Bliesner, B., Phillips,  
530 A. S., Sacks, W., Tilmes, S., van Kampenhout, L., Vertenstein, M., Bertini, A., Dennis, J., Deser, C., Fischer, C.,  
531 Fox-Kemper, B., Kay, J. E., Kinnison, D., Kushner, P. J., Larson, V. E., Long, M. C., Mickelson, S., Moore, J. K.,  
532 Nienhouse, E., Polvani, L., Rasch, P. J., and Strand, W. G.: The Community Earth System Model Version 2  
533 (CESM2), *J. Adv. Model. Earth Syst.*, 12, e2019MS001916, <https://doi.org/10.1029/2019MS001916>, 2020.

534 Doherty, O. M., Riemer, N., and Hameed, S.: Saharan mineral dust transport into the Caribbean: Observed  
535 atmospheric controls and trends, *J. Geophys. Res. Atmospheres*, 113, <https://doi.org/10.1029/2007JD009171>, 2008.

536 Duniway, M. C., Pfennigwerth, A. A., Fick, S. E., Nauman, T. W., Belnap, J., and Barger, N. N.: Wind erosion and  
537 dust from US drylands: a review of causes, consequences, and solutions in a changing world, *Ecosphere*, 10,  
538 e02650, <https://doi.org/10.1002/ecs2.2650>, 2019.

539 Dunne, J. P., Horowitz, L. W., Adcroft, A. J., Ginoux, P., Held, I. M., John, J. G., Krasting, J. P., Malyshev, S.,  
540 Naik, V., Paulot, F., Shevliakova, E., Stock, C. A., Zadeh, N., Balaji, V., Blanton, C., Dunne, K. A., Dupuis, C.,  
541 Durachta, J., Dussin, R., Gauthier, P. P. G., Griffies, S. M., Guo, H., Hallberg, R. W., Harrison, M., He, J., Hurlin,  
542 W., McHugh, C., Menzel, R., Milly, P. C. D., Nikonov, S., Paynter, D. J., Ploshay, J., Radhakrishnan, A., Rand, K.,  
543 Reichl, B. G., Robinson, T., Schwarzkopf, D. M., Sentman, L. T., Underwood, S., Vahlenkamp, H., Winton, M.,  
544 Wittenberg, A. T., Wyman, B., Zeng, Y., and Zhao, M.: The GFDL Earth System Model Version 4.1 (GFDL-ESM  
545 4.1): Overall Coupled Model Description and Simulation Characteristics, *J. Adv. Model. Earth Syst.*, 12,  
546 e2019MS002015, <https://doi.org/10.1029/2019MS002015>, 2020.

547 Evan, A. T., Flamant, C., Gaetani, M., and Guichard, F.: The past, present and future of African dust, *Nature*, 531,  
548 493–495, <https://doi.org/10.1038/nature17149>, 2016.

549 Flamant, C., Chaboureaud, J.-P., Parker, D. J., Taylor, C. M., Cammas, J.-P., Bock, O., Timouk, F., and Pelon, J.:  
550 Airborne observations of the impact of a convective system on the planetary boundary layer thermodynamics and  
551 aerosol distribution in the inter-tropical discontinuity region of the West African Monsoon, *Q. J. R. Meteorol. Soc.*,  
552 133, 1175–1189, <https://doi.org/10.1002/qj.97>, 2007.

553 Folland, C. K., Knight, J., Linderholm, H. W., Fereday, D., Ineson, S., and Hurrell, J. W.: The Summer North  
554 Atlantic Oscillation: Past, Present, and Future, *J. Clim.*, 22, 1082–1103, <https://doi.org/10.1175/2008JCLI2459.1>,  
555 2009.

556 Francis, D., Fonseca, R., Nelli, N., Cuesta, J., Weston, M., Evan, A., and Temimi, M.: The Atmospheric Drivers of  
557 the Major Saharan Dust Storm in June 2020, *Geophys. Res. Lett.*, 47, e2020GL090102,  
558 <https://doi.org/10.1029/2020GL090102>, 2020.

559 Gonzalez, M. E., Garfield, J. G., Corral, A. F., Edwards, E.-L., Zeider, K., and Sorooshian, A.: Extreme Aerosol  
560 Events at Mesa Verde, Colorado: Implications for Air Quality Management, *Atmosphere*, 12, 1140,  
561 <https://doi.org/10.3390/atmos12091140>, 2021.

562 Gorham, K. A., Raffuse, S. M., Hyslop, N. P., and White, W. H.: Comparison of recent speciated PM<sub>2.5</sub> data from  
563 collocated CSN and IMPROVE measurements, *Atmos. Environ.*, 244, 117977,  
564 <https://doi.org/10.1016/j.atmosenv.2020.117977>, 2021.

Hand, J. L., Schichtel, B. A., Pitchford, M., Malm, W. C., and Frank, N. H.: Seasonal composition of remote and urban fine particulate matter in the United States, *J. Geophys. Res. Atmospheres*, 117, <https://doi.org/10.1029/2011JD017122>, 2012a.

Hand, J. L., Schichtel, B. A., Pitchford, M., Malm, W. C., and Frank, N. H.: Seasonal composition of remote and urban fine particulate matter in the United States, *J. Geophys. Res. Atmospheres*, 117, <https://doi.org/10.1029/2011JD017122>, 2012b.

Hand, J. L., Gill, T. E., and Schichtel, B. A.: Spatial and seasonal variability in fine mineral dust and coarse aerosol mass at remote sites across the United States, *J. Geophys. Res. Atmospheres*, 122, 3080–3097, <https://doi.org/10.1002/2016JD026290>, 2017.

Hurrell, J. W.: Decadal Trends in the North Atlantic Oscillation: Regional Temperatures and Precipitation, *Science*, 269, 676–679, 1995.

Jones, C., Mahowald, N., and Luo, C.: The Role of Easterly Waves on African Desert Dust Transport, *J. Clim.*, 16, 3617–3628, [https://doi.org/10.1175/1520-0442\(2003\)016<3617:TROEWO>2.0.CO;2](https://doi.org/10.1175/1520-0442(2003)016<3617:TROEWO>2.0.CO;2), 2003.

Jones, P. D., Jonsson, T., and Wheeler, D.: Extension to the North Atlantic oscillation using early instrumental pressure observations from Gibraltar and south-west Iceland, *Int. J. Climatol.*, 17, 1433–1450, [https://doi.org/10.1002/\(SICI\)1097-0088\(19971115\)17:13<1433::AID-JOC203>3.0.CO;2-P](https://doi.org/10.1002/(SICI)1097-0088(19971115)17:13<1433::AID-JOC203>3.0.CO;2-P), 1997.

Karanasiou, A., Moreno, N., Moreno, T., Viana, M., de Leeuw, F., and Querol, X.: Health effects from Sahara dust episodes in Europe: Literature review and research gaps, *Environ. Int.*, 47, 107–114, <https://doi.org/10.1016/j.envint.2012.06.012>, 2012.

Kelley, M., Schmidt, G. A., Nazarenko, L. S., Bauer, S. E., Ruedy, R., Russell, G. L., Ackerman, A. S., Aleinov, I., Bauer, M., Bleck, R., Canuto, V., Cesana, G., Cheng, Y., Clune, T. L., Cook, B. I., Cruz, C. A., Del Genio, A. D., Elsaesser, G. S., Faluvegi, G., Kiang, N. Y., Kim, D., Lacis, A. A., Leboissetier, A., LeGrande, A. N., Lo, K. K., Marshall, J., Matthews, E. E., McDermid, S., Mezuman, K., Miller, R. L., Murray, L. T., Oinas, V., Orbe, C., García-Pando, C. P., Perlwitz, J. P., Puma, M. J., Rind, D., Romanou, A., Shindell, D. T., Sun, S., Tausnev, N., Tsigaridis, K., Tselioudis, G., Weng, E., Wu, J., and Yao, M.-S.: GISS-E2.1: Configurations and Climatology, *J. Adv. Model. Earth Syst.*, 12, e2019MS002025, <https://doi.org/10.1029/2019MS002025>, 2020.

Kelly, P. and Mapes, B.: Zonal mean wind, the Indian monsoon, and July drying in the western Atlantic subtropics, *J. Geophys. Res. Atmospheres*, 116, <https://doi.org/10.1029/2010JD015405>, 2011.

Kim, D., Chin, M., Cruz, C. A., Tong, D., and Yu, H.: Spring Dust in Western North America and Its Interannual Variability—Understanding the Role of Local and Transported Dust, *J. Geophys. Res. Atmospheres*, 126, e2021JD035383, <https://doi.org/10.1029/2021JD035383>, 2021.

Knippertz, P. and Todd, M. C.: The central west Saharan dust hot spot and its relation to African easterly waves and extratropical disturbances, *J. Geophys. Res. Atmospheres*, 115, <https://doi.org/10.1029/2009JD012819>, 2010.

Li, W., Li, L., Fu, R., Deng, Y., and Wang, H.: Changes to the North Atlantic Subtropical High and Its Role in the Intensification of Summer Rainfall Variability in the Southeastern United States, *J. Clim.*, 24, 1499–1506, <https://doi.org/10.1175/2010JCLI3829.1>, 2011.

Li, W., Wang, Y., Flynn, J., Griffin, R. J., Guo, F., and Schnell, J. L.: Spatial Variation of Surface O<sub>3</sub> Responses to Drought Over the Contiguous United States During Summertime: Role of Precursor Emissions and Ozone Chemistry, *J. Geophys. Res. Atmospheres*, 127, e2021JD035607, <https://doi.org/10.1029/2021JD035607>, 2022.

604 Linderholm, H. W., Folland, C. K., and Walther, A.: A multicentury perspective on the summer North Atlantic  
605 Oscillation (SNAO) and drought in the eastern Atlantic Region, *J. Quat. Sci.*, 24, 415–425,  
606 <https://doi.org/10.1002/jqs.1261>, 2009.

607 Liu, C., Liao, X., Qiu, J., Yang, Y., Feng, X., Allan, R. P., Cao, N., Long, J., and Xu, J.: Observed variability of  
608 intertropical convergence zone over 1998–2018, *Environ. Res. Lett.*, 15, 104011, <https://doi.org/10.1088/1748-9326/aba033>, 2020.

610 Middleton, N. J.: Desert dust hazards: A global review, *Aeolian Res.*, 24, 53–63,  
611 <https://doi.org/10.1016/j.aeolia.2016.12.001>, 2017.

612 Moulin, C. and Chiapello, I.: Evidence of the control of summer atmospheric transport of African dust over the  
613 Atlantic by Sahel sources from TOMS satellites (1979–2000), *Geophys. Res. Lett.*, 31,  
614 <https://doi.org/10.1029/2003GL018931>, 2004.

615 van Noije, T., Bergman, T., Le Sager, P., O'Donnell, D., Makkonen, R., Gonçalves-Ageitos, M., Döscher, R.,  
616 Fladrich, U., von Hardenberg, J., Keskinen, J.-P., Korhonen, H., Laakso, A., Myriokefalitakis, S., Ollinaho, P., Pérez  
617 García-Pando, C., Reerink, T., Schrödner, R., Wyser, K., and Yang, S.: EC-Earth3-AerChem: a global climate  
618 model with interactive aerosols and atmospheric chemistry participating in CMIP6, *Geosci. Model Dev.*, 14, 5637–  
619 5668, <https://doi.org/10.5194/gmd-14-5637-2021>, 2021.

620 Payra, S., Gupta, P., Bhatla, R., El Amraoui, L., and Verma, S.: Temporal and spatial variability in aerosol optical  
621 depth (550 nm) over four major cities of India using data from MODIS onboard the Terra and Aqua satellites, *Arab.*  
622 *J. Geosci.*, 14, 1256, <https://doi.org/10.1007/s12517-021-07455-y>, 2021.

623 Perry, K. D., Cahill, T. A., Eldred, R. A., Dutcher, D. D., and Gill, T. E.: Long-range transport of North African dust  
624 to the eastern United States, *J. Geophys. Res. Atmospheres*, 102, 11225–11238, <https://doi.org/10.1029/97JD00260>,  
625 1997.

626 Piechota, T. C. and Dracup, J. A.: Drought and Regional Hydrologic Variation in the United States: Associations  
627 with the El Niño-Southern Oscillation, *Water Resour. Res.*, 32, 1359–1373, <https://doi.org/10.1029/96WR00353>,  
628 1996.

629 Prospero, J. M. and Mayol-Bracero, O. L.: Understanding the Transport and Impact of African Dust on the  
630 Caribbean Basin, *Bull. Am. Meteorol. Soc.*, 94, 1329–1337, <https://doi.org/10.1175/BAMS-D-12-00142.1>, 2013.

631 Prospero, J. M. and Nees, R. T.: Impact of the North African drought and El Niño on mineral dust in the Barbados  
632 trade winds, *Nature*, 320, 735–738, <https://doi.org/10.1038/320735a0>, 1986.

633 Prospero, J. M., Landing, W. M., and Schulz, M.: African dust deposition to Florida: Temporal and spatial  
634 variability and comparisons to models, *J. Geophys. Res. Atmospheres*, 115, <https://doi.org/10.1029/2009JD012773>,  
635 2010.

636 Pu, B. and Ginoux, P.: Climatic factors contributing to long-term variations in surface fine dust concentration in the  
637 United States, *Atmospheric Chem. Phys.*, 18, 4201–4215, <https://doi.org/10.5194/acp-18-4201-2018>, 2018.

638 Pu, B. and Jin, Q.: A Record-Breaking Trans-Atlantic African Dust Plume Associated with Atmospheric Circulation  
639 Extremes in June 2020, *Bull. Am. Meteorol. Soc.*, 102, E1340–E1356, <https://doi.org/10.1175/BAMS-D-21-0014.1>,  
640 2021.

641 Pu, B., Fu, R., Dickinson, R. E., and Fernando, D. N.: Why do summer droughts in the Southern Great Plains occur  
642 in some La Niña years but not others?, *J. Geophys. Res. Atmospheres*, 121, 1120–1137,  
643 <https://doi.org/10.1002/2015JD023508>, 2016.

644 Ridley, D. A., Heald, C. L., and Ford, B.: North African dust export and deposition: A satellite and model  
645 perspective, *J. Geophys. Res. Atmospheres*, 117, <https://doi.org/10.1029/2011JD016794>, 2012.

646 Sassen, K.: Indirect climate forcing over the western US from Asian dust storms, *Geophys. Res. Lett.*, 29, 103-1-  
647 103-4, <https://doi.org/10.1029/2001GL014051>, 2002.

648 Schnell, J. L., Holmes, C. D., Jangam, A., and Prather, M. J.: Skill in forecasting extreme ozone pollution episodes  
649 with a global atmospheric chemistry model, *Atmospheric Chem. Phys.*, 14, 7721–7739, [https://doi.org/10.5194/acp-](https://doi.org/10.5194/acp-14-7721-2014)  
650 14-7721-2014, 2014.

651 Séférian, R., Nabat, P., Michou, M., Saint-Martin, D., Voldoire, A., Colin, J., Decharme, B., Delire, C., Berthet, S.,  
652 Chevallier, M., Sénési, S., Franchisteguy, L., Vial, J., Mallet, M., Joetzjer, E., Geoffroy, O., Guérémy, J.-F., Moine,  
653 M.-P., Msadek, R., Ribes, A., Rocher, M., Roehrig, R., Salas-y-Méla, D., Sanchez, E., Terray, L., Valcke, S.,  
654 Waldman, R., Aumont, O., Bopp, L., Deshayes, J., Éthé, C., and Madec, G.: Evaluation of CNRM Earth System  
655 Model, CNRM-ESM2-1: Role of Earth System Processes in Present-Day and Future Climate, *J. Adv. Model. Earth*  
656 *Syst.*, 11, 4182–4227, <https://doi.org/10.1029/2019MS001791>, 2019.

657 Seland, Ø., Bentsen, M., Olivie, D., Toniazzo, T., Gjermundsen, A., Graff, L. S., Debernard, J. B., Gupta, A. K., He,  
658 Y.-C., Kirkevåg, A., Schwinger, J., Tjiputra, J., Aas, K. S., Bethke, I., Fan, Y., Griesfeller, J., Grini, A., Guo, C.,  
659 Ilicak, M., Karset, I. H. H., Landgren, O., Liakka, J., Moseid, K. O., Nummelin, A., Spensberger, C., Tang, H.,  
660 Zhang, Z., Heinze, C., Iversen, T., and Schulz, M.: Overview of the Norwegian Earth System Model (NorESM2)  
661 and key climate response of CMIP6 DECK, historical, and scenario simulations, *Geosci. Model Dev.*, 13, 6165–  
662 6200, <https://doi.org/10.5194/gmd-13-6165-2020>, 2020.

663 Senior, C. A., Jones, C. G., Wood, R. A., Sellar, A., Belcher, S., Klein-Tank, A., Sutton, R., Walton, J., Lawrence,  
664 B., Andrews, T., and Mulcahy, J. P.: U.K. Community Earth System Modeling for CMIP6, *J. Adv. Model. Earth*  
665 *Syst.*, 12, e2019MS002004, <https://doi.org/10.1029/2019MS002004>, 2020.

666 Sheen, K. L., Smith, D. M., Dunstone, N. J., Eade, R., Rowell, D. P., and Vellinga, M.: Skilful prediction of Sahel  
667 summer rainfall on inter-annual and multi-year timescales, *Nat. Commun.*, 8, 14966,  
668 <https://doi.org/10.1038/ncomms14966>, 2017.

669 Svoboda, M., LeComte, D., Hayes, M., Heim, R., Gleason, K., Angel, J., Rippey, B., Tinker, R., Palecki, M.,  
670 Stooksbury, D., Miskus, D., and Stephens, S.: The drought monitor, *Bull. Am. Meteorol. Soc.*, 83, 1181–1190,  
671 <https://doi.org/10.1175/1520-0477-83.8.1181>, 2002.

672 Tatebe, H., Ogura, T., Nitta, T., Komuro, Y., Ogochi, K., Takemura, T., Sudo, K., Sekiguchi, M., Abe, M., Saito, F.,  
673 Chikira, M., Watanabe, S., Mori, M., Hirota, N., Kawatani, Y., Mochizuki, T., Yoshimura, K., Takata, K., O'ishi,  
674 R., Yamazaki, D., Suzuki, T., Kurogi, M., Kataoka, T., Watanabe, M., and Kimoto, M.: Description and basic  
675 evaluation of simulated mean state, internal variability, and climate sensitivity in MIROC6, *Geosci. Model Dev.*, 12,  
676 2727–2765, <https://doi.org/10.5194/gmd-12-2727-2019>, 2019.

677 Tegen, I., Lacis, A. A., and Fung, I.: The influence on climate forcing of mineral aerosols from disturbed soils,  
678 *Nature*, 380, 419–422, <https://doi.org/10.1038/380419a0>, 1996.

679 Tong, D. Q., Wang, J. X. L., Gill, T. E., Lei, H., and Wang, B.: Intensified dust storm activity and Valley fever  
680 infection in the southwestern United States, *Geophys. Res. Lett.*, 44, 4304–4312,  
681 <https://doi.org/10.1002/2017GL073524>, 2017.

682 VanCuren, R. A. and Cahill, T. A.: Asian aerosols in North America: Frequency and concentration of fine dust, *J.*  
683 *Geophys. Res. Atmospheres*, 107, AAC 19-1-AAC 19-16, <https://doi.org/10.1029/2002JD002204>, 2002.

684 Visbeck, M. H., Hurrell, J. W., Polvani, L., and Cullen, H. M.: The North Atlantic Oscillation: Past, present, and  
685 future, *Proc. Natl. Acad. Sci.*, 98, 12876–12877, <https://doi.org/10.1073/pnas.231391598>, 2001.

686 Wang, C.: Variability of the Caribbean Low-Level Jet and its relations to climate, *Clim. Dyn.*, 29, 411–422,  
687 <https://doi.org/10.1007/s00382-007-0243-z>, 2007.

688 Wang, Y., Xie, Y., Dong, W., Ming, Y., Wang, J., and Shen, L.: Adverse effects of increasing drought on air quality  
689 via natural processes, *Atmospheric Chem. Phys.*, 17, 12827–12843, <https://doi.org/10.5194/acp-17-12827-2017>,  
690 2017.

691 Wu, T., Zhang, F., Zhang, J., Jie, W., Zhang, Y., Wu, F., Li, L., Yan, J., Liu, X., Lu, X., Tan, H., Zhang, L., Wang,  
692 J., and Hu, A.: Beijing Climate Center Earth System Model version 1 (BCC-ESM1): model description and  
693 evaluation of aerosol simulations, *Geosci. Model Dev.*, 13, 977–1005, <https://doi.org/10.5194/gmd-13-977-2020>,  
694 2020.

695 Yu, H., Tan, Q., Zhou, L., Zhou, Y., Bian, H., Chin, M., Ryder, C. L., Levy, R. C., Pradhan, Y., Shi, Y., Song, Q.,  
696 Zhang, Z., Colarco, P. R., Kim, D., Remer, L. A., Yuan, T., Mayol-Bracero, O., and Holben, B. N.: Observation and  
697 modeling of the historic “Godzilla” African dust intrusion into the Caribbean Basin and the southern US in June  
698 2020, *Atmospheric Chem. Phys.*, 21, 12359–12383, <https://doi.org/10.5194/acp-21-12359-2021>, 2021.

699 Yuan, T., Yu, H., Chin, M., and Remer, L.: Future Decline of African Dust: Insights from the Recent Past and  
700 Paleo-records, *ArXiv180407188 Phys.*, 2018.

701 Yukimoto, S., Kawai, H., Koshiro, T., Oshima, N., Yoshida, K., Urakawa, S., Tsujino, H., Deushi, M., Tanaka, T.,  
702 Hosaka, M., Yabu, S., Yoshimura, H., Shindo, E., Mizuta, R., Obata, A., Adachi, Y., and Ishii, M.: The  
703 Meteorological Research Institute Earth System Model Version 2.0, MRI-ESM2.0: Description and Basic  
704 Evaluation of the Physical Component, *J. Meteorol. Soc. Jpn. Ser II*, 97, 931–965,  
705 <https://doi.org/10.2151/jmsj.2019-051>, 2019.

706 Zuidema, P., Alvarez, C., Kramer, S. J., Custals, L., Izaguirre, M., Sealy, P., Prospero, J. M., and Blades, E.: Is  
707 Summer African Dust Arriving Earlier to Barbados? The Updated Long-Term In Situ Dust Mass Concentration  
708 Time Series from Ragged Point, Barbados, and Miami, Florida, *Bull. Am. Meteorol. Soc.*, 100, 1981–1986,  
709 <https://doi.org/10.1175/BAMS-D-18-0083.1>, 2019.

710
